# Supplementary material
Source: PubMed Central journal article supplement (PMC6052279)
Supplement: AEM.00896-18_zam015188661s1.pdf [file AEM.00896-18_zam015188661s1.pdf]

1 **Supplemental Material**

2 **Quantifying the Relative Contributions of Environmental Sources to the Microbial**  
3 **Community in an Urban Stream under Dry and Wet Weather Conditions**

4  
5 Darshan Baral,<sup>a,\*</sup> Allison Speicher,<sup>a,~</sup> Bruce Dvorak,<sup>a</sup> David Admiraal,<sup>a</sup> and Xu Li<sup>a,#</sup>

6  
7 <sup>a</sup>Department of Civil Engineering, University of Nebraska, Lincoln, Nebraska, USA

8  
9 Running Head: Relative Contribution of Sources to Microbes in Stream

10  
11 <sup>#</sup>Address Correspondence to Xu Li, xuli@unl.edu

12 <sup>\*</sup>Current address: HDR, Inc., Omaha, Nebraska

13 <sup>~</sup>Current address: HDR, Inc., Bellevue, Washington

14  
15 Number of pages: 40

16 Number of Tables: 8

17 Number of Figures: 14

18 **TABLES**

19 Table S1: Summary of  $\alpha$ -diversity indices.

| Category              | Sample Type (# of samples)     | $\alpha$ -Diversity, mean (standard deviation) |           |               |
|-----------------------|--------------------------------|------------------------------------------------|-----------|---------------|
|                       |                                | Chao1                                          | Shannon   | observed OTUs |
| Environmental samples | Dry Weather Water (43)         | 534 (122)                                      | 6.0 (0.9) | 343 (77)      |
|                       | Rising Limb (15)               | 772 (133)                                      | 6.8 (0.6) | 508 (100)     |
|                       | Peak Flow (32)                 | 753 (127)                                      | 6.9 (0.6) | 509 (98)      |
|                       | Declining Limb (19)            | 715 (127)                                      | 6.7 (0.6) | 478 (91)      |
|                       | Streambed Sediment (45)        | 729 (119)                                      | 7.1 (0.6) | 523 (95)      |
|                       | Holmes Lake Water (19)         | 400 (100)                                      | 5.6 (0.6) | 265 (51)      |
|                       | Storm Drain Outfall Water (24) | 685 (139)                                      | 6.5 (0.9) | 456 (101)     |
|                       | Street Sweepings (3)           | 693 (46)                                       | 7.3 (0.3) | 511 (17)      |
|                       | Erodible Soil (20)             | 670 (115)                                      | 7.7 (0.6) | 519 (71)      |
|                       | Embankment Soil (49)           | 634 (100)                                      | 7.8 (0.4) | 511 (72)      |
| Fecal samples         | Sanitary Sewage (7)            | 259 (38)                                       | 4.8 (0.2) | 179 (19)      |
|                       | Duck Feces (4)                 | 234 (83)                                       | 3.7 (0.9) | 143 (59)      |
|                       | Pigeon Feces (3)               | 223 (66)                                       | 3.8 (0.6) | 136 (50)      |
|                       | Goose Feces (5)                | 190 (88)                                       | 4.3 (0.4) | 114 (49)      |
|                       | Horse Feces (4)                | 185 (41)                                       | 5.9 (0.3) | 140 (13)      |
|                       | Small Mammal Feces (4)         | 176 (73)                                       | 4.1 (0.7) | 121 (50)      |
|                       | Swallow Feces (6)              | 157 (75)                                       | 3.2 (1)   | 94 (35)       |
|                       | Dog Feces (4)                  | 115 (81)                                       | 3.6 (0.5) | 80 (51)       |

20

21 Table S2: Summary of water quality parameters for water collected from Antelope Creek.

| Water Quality Parameters    | Dry Weather <sup>1</sup><br>(n = 43) | Wet Weather <sup>1</sup> |                       |                            |
|-----------------------------|--------------------------------------|--------------------------|-----------------------|----------------------------|
|                             |                                      | Rising Limb<br>(n = 15)  | Peak Flow<br>(n = 32) | Declining Limb<br>(n = 19) |
| NH <sub>3</sub> -N (mg/L)   | 0.08 (0.09)                          | 0.30 (0.30)              | 0.40 (0.20)           | 0.20 (0.30)                |
| TKN (mg/L)                  | 1.0 (0.4)                            | 4.0 (2)                  | 3.0 (1)               | 2.0 (0.5)                  |
| NO <sub>3</sub> -N (mg/L)   | 0.6 (0.8)                            | 0.6 (0.1)                | 0.6 (0.1)             | 0.5 (0.4)                  |
| SRP (mg/L)                  | 0.2 (0.1)                            | 0.2 (0.1)                | 0.2 (0.09)            | 0.2 (0.1)                  |
| TP (mg/L)                   | 0.30 (0.10)                          | 0.80 (0.50)              | 0.60 (0.20)           | 0.30 (0.09)                |
| <i>E. coli</i> (CFU/100 mL) | 2,000 (3,000)                        | 50,000 (40,000)          | 70,000 (50,000)       | 60,000 (90,000)            |
| Turbidity (NTU)             | 20 (10)                              | 70 (60)                  | 80 (40)               | 30 (10)                    |
| Chloride (mg/L)             | 20 (20)                              | 10 (8)                   | 8 (4)                 | 10 (4)                     |
| TSS (mg/L)                  | 30 (90)                              | 400 (300)                | 300 (200)             | 40 (40)                    |
| COD (mg/L)                  | 20 (10)                              | 60 (40)                  | 70 (50)               | 40 (30)                    |

22 <sup>1</sup>Mean (Standard Deviation)

23 Table S3: Summary of the relative abundance of major families (i.e., relative abundance  $\geq 0.1\%$ ) in various sample types.

| Sample Type       | Phylum         | Class                 | Order              | Family              | Relative Abundance (%) |
|-------------------|----------------|-----------------------|--------------------|---------------------|------------------------|
| Dry Weather Water | Actinobacteria | Actinobacteria        | Actinomycetales    | ACK-M1              | 6.4                    |
|                   | Bacteroidetes  | [Saprosirae]          | [Saprosirales]     | Chitinophagaceae    | 4.9                    |
|                   |                | Bacteroidia           | Bacteroidales      | Other               | 0.1                    |
|                   |                | Flavobacteriia        | Flavobacteriales   | Flavobacteriaceae   | 4.3                    |
|                   | Cyanobacteria  | Oscillatoriothycideae | Chroococcales      | Microcystaceae      | 5.1                    |
|                   | Firmicutes     | Bacilli               | Bacillales         | [Exiguobacteraceae] | 0.2                    |
|                   |                | Erysipelotrichi       | Erysipelotrichales | Erysipelotrichaceae | 0.4                    |
|                   | Other          | Other                 | Other              | Other               | 0.9                    |
|                   | Proteobacteria | Alphaproteobacteria   | Rhizobiales        | Hyphomicrobiaceae   | 0.3                    |
|                   |                |                       | Rhodobacterales    | Rhodobacteraceae    | 2.4                    |
|                   |                | Betaproteobacteria    | Burkholderiales    | Comamonadaceae      | 10.3                   |
|                   |                |                       |                    | Oxalobacteraceae    | 1.5                    |
|                   |                |                       | Rhodocyclales      | Rhodocyclaceae      | 1.4                    |
|                   |                | Deltaproteobacteria   | Myxococcales       | Other               | 0.1                    |
|                   |                | Epsilonproteobacteria | Campylobacterales  | Campylobacteraceae  | 0.9                    |
|                   |                | Gammaproteobacteria   | Aeromonadales      | Aeromonadaceae      | 0.6                    |
|                   |                |                       | Alteromonadales    | [Chromatiaceae]     | 9.9                    |
|                   |                |                       |                    | Alteromonadaceae    | 0.5                    |
|                   |                |                       | Enterobacteriales  | Enterobacteriaceae  | 0.2                    |
|                   |                |                       | Pseudomonadales    | Moraxellaceae       | 0.6                    |
| Pseudomonadaceae  |                |                       |                    | 2.0                 |                        |

| <b>Sample Type</b> | <b>Phylum</b>  | <b>Class</b>          | <b>Order</b>       | <b>Family</b>       | <b>Relative Abundance (%)</b> |
|--------------------|----------------|-----------------------|--------------------|---------------------|-------------------------------|
| Rising Limb Water  | Actinobacteria | Actinobacteria        | Actinomycetales    | ACK-M1              | 0.3                           |
|                    |                | Thermoleophilia       | Gaiellales         | Gaiellaceae         | 0.1                           |
|                    | Bacteroidetes  | [Saprosirae]          | [Saprosirales]     | Chitinophagaceae    | 1.8                           |
|                    |                | Bacteroidia           | Bacteroidales      | Other               | 0.1                           |
|                    |                | Flavobacteriia        | Flavobacteriales   | Flavobacteriaceae   | 2.1                           |
|                    | Cyanobacteria  | Oscillatoriothycideae | Chroococcales      | Microcystaceae      | 0.2                           |
|                    | Firmicutes     | Bacilli               | Bacillales         | [Exiguobacteraceae] | 4.4                           |
|                    |                |                       |                    | Paenibacillaceae    | 0.8                           |
|                    |                | Erysipelotrichi       | Erysipelotrichales | Enterococcaceae     | 0.3                           |
|                    |                |                       |                    | Erysipelotrichaceae | 0.2                           |
|                    | Other          | Other                 | Other              | Other               | 2.0                           |
|                    | Proteobacteria | Alphaproteobacteria   | Rhizobiales        | Hyphomicrobiaceae   | 0.7                           |
|                    |                |                       | Rhodobacterales    | Rhodobacteraceae    | 7.1                           |
|                    |                | Betaproteobacteria    | Burkholderiales    | Comamonadaceae      | 8.7                           |
|                    |                |                       |                    | Oxalobacteraceae    | 7.8                           |
|                    |                |                       | Rhodocyclales      | Rhodocyclaceae      | 0.9                           |
|                    |                | Deltaproteobacteria   | Myxococcales       | Other               | 0.3                           |
|                    |                | Epsilonproteobacteria | Campylobacterales  | Campylobacteraceae  | 0.3                           |
|                    |                | Gammaproteobacteria   | Aeromonadales      | Aeromonadaceae      | 1.2                           |
|                    |                |                       |                    | [Chromatiaceae]     | 2.6                           |
|                    |                |                       | Alteromonadales    | Alteromonadaceae    | 0.4                           |
| Enterobacteriales  |                |                       |                    | Enterobacteriaceae  | 3.4                           |
| Pseudomonadales    |                |                       | Moraxellaceae      | 9.9                 |                               |
|                    |                |                       | Pseudomonadaceae   | 4.5                 |                               |

| <b>Sample Type</b> | <b>Phylum</b>    | <b>Class</b>          | <b>Order</b>       | <b>Family</b>       | <b>Relative Abundance (%)</b> |
|--------------------|------------------|-----------------------|--------------------|---------------------|-------------------------------|
| Peak Flow Water    | Actinobacteria   | Thermoleophilia       | Gaiellales         | Gaiellaceae         | 0.2                           |
|                    | Bacteroidetes    | [Saprospirae]         | [Saprospirales]    | Chitinophagaceae    | 1.3                           |
|                    |                  | Bacteroidia           | Bacteroidales      | Other               | 0.1                           |
|                    |                  | Flavobacteriia        | Flavobacteriales   | Flavobacteriaceae   | 2.4                           |
|                    | Cyanobacteria    | Oscillatoriothyriceae | Chroococcales      | Microcystaceae      | 0.2                           |
|                    | Firmicutes       | Bacilli               | Bacillales         | [Exiguobacteraceae] | 1.0                           |
|                    |                  |                       |                    | Paenibacillaceae    | 1.1                           |
|                    |                  | Erysipelotrichi       | Erysipelotrichales | Erysipelotrichaceae | 0.2                           |
|                    | Other            | Other                 | Other              | Other               | 0.9                           |
|                    | Proteobacteria   | Alphaproteobacteria   | Rhizobiales        | Hyphomicrobiaceae   | 0.7                           |
|                    |                  |                       | Rhodobacterales    | Rhodobacteraceae    | 5.0                           |
|                    |                  | Betaproteobacteria    | Burkholderiales    | Comamonadaceae      | 12.0                          |
|                    |                  |                       |                    | Oxalobacteraceae    | 8.2                           |
|                    |                  |                       | Rhodocyclales      | Rhodocyclaceae      | 1.1                           |
|                    |                  | Deltaproteobacteria   | Myxococcales       | Other               | 0.3                           |
|                    |                  | Epsilonproteobacteria | Campylobacteriales | Campylobacteraceae  | 0.4                           |
|                    |                  | Gammaproteobacteria   | Aeromonadales      | Aeromonadaceae      | 4.7                           |
|                    |                  |                       |                    | [Chromatiaceae]     | 3.8                           |
|                    |                  |                       | Alteromonadales    | Alteromonadaceae    | 0.7                           |
|                    |                  |                       | Enterobacteriales  | Enterobacteriaceae  | 6.9                           |
| Pseudomonadales    |                  |                       | Moraxellaceae      | 9.5                 |                               |
|                    | Pseudomonadaceae | 7.4                   |                    |                     |                               |

| <b>Sample Type</b>   | <b>Phylum</b>     | <b>Class</b>           | <b>Order</b>     | <b>Family</b>       | <b>Relative Abundance (%)</b> |                  |     |
|----------------------|-------------------|------------------------|------------------|---------------------|-------------------------------|------------------|-----|
| Declining Limb Water | Actinobacteria    | Actinobacteria         | Actinomycetales  | ACK-M1              | 3.1                           |                  |     |
|                      | Bacteroidetes     | [Saprospirae]          | [Saprospirales]  | Chitinophagaceae    | 2.9                           |                  |     |
|                      |                   | Flavobacteriia         | Flavobacteriales | Flavobacteriaceae   | 5.4                           |                  |     |
|                      | Cyanobacteria     | Oscillatorioophycideae | Chroococcales    | Microcystaceae      | 1.0                           |                  |     |
|                      | Firmicutes        | Bacilli                | Bacillales       | [Exiguobacteraceae] | 1.4                           |                  |     |
|                      |                   |                        |                  | Paenibacillaceae    | 0.5                           |                  |     |
|                      | Other             | Other                  | Other            | Other               | 0.5                           |                  |     |
|                      | Proteobacteria    | Alphaproteobacteria    |                  | Rhizobiales         | Hyphomicrobiaceae             | 0.5              |     |
|                      |                   |                        |                  | Rhodobacterales     | Rhodobacteraceae              | 3.9              |     |
|                      |                   | Betaproteobacteria     |                  | Burkholderiales     | Comamonadaceae                | 22.5             |     |
|                      |                   |                        |                  |                     | Oxalobacteraceae              | 6.3              |     |
|                      |                   |                        |                  | Rhodocyclales       | Rhodocyclaceae                | 2.3              |     |
|                      |                   | Deltaproteobacteria    |                  | Myxococcales        | Other                         | 0.5              |     |
|                      |                   | Epsilonproteobacteria  |                  | Campylobacterales   | Campylobacteraceae            | 0.7              |     |
|                      |                   | Gammaproteobacteria    |                  |                     | Aeromonadales                 | Aeromonadaceae   | 3.3 |
|                      |                   |                        |                  |                     | Alteromonadales               | [Chromatiaceae]  | 1.9 |
|                      |                   |                        |                  |                     |                               | Alteromonadaceae | 0.9 |
|                      | Enterobacteriales |                        |                  |                     | Enterobacteriaceae            | 2.2              |     |
| Pseudomonadales      | Moraxellaceae     |                        |                  |                     | 2.9                           |                  |     |
|                      | Pseudomonadaceae  | 3.2                    |                  |                     |                               |                  |     |

| <b>Sample Type</b>              | <b>Phylum</b>    | <b>Class</b>          | <b>Order</b>     | <b>Family</b>       | <b>Relative Abundance (%)</b> |                    |     |
|---------------------------------|------------------|-----------------------|------------------|---------------------|-------------------------------|--------------------|-----|
| Storm Drain<br>Outfall<br>Water | Actinobacteria   | Actinobacteria        | Actinomycetales  | ACK-M1              | 0.3                           |                    |     |
|                                 |                  | Thermoleophilia       | Gaiellales       | Gaiellaceae         | 0.1                           |                    |     |
|                                 | Bacteroidetes    | [Saprospirae]         | [Saprospirales]  | Chitinophagaceae    | 1.5                           |                    |     |
|                                 |                  | Flavobacteriia        | Flavobacteriales | Flavobacteriaceae   | 4.4                           |                    |     |
|                                 | Cyanobacteria    | Chloroplast           | Streptophyta     | Other               | 0.1                           |                    |     |
|                                 |                  | Oscillatoriothycideae | Chroococcales    | Microcystaceae      | 0.2                           |                    |     |
|                                 | Firmicutes       | Bacilli               | Bacillales       | [Exiguobacteraceae] | 0.2                           |                    |     |
|                                 |                  |                       |                  | Paenibacillaceae    | 0.4                           |                    |     |
|                                 | Other            | Other                 | Other            | Other               | 1.7                           |                    |     |
|                                 | Proteobacteria   | Alphaproteobacteria   |                  | Rhizobiales         | Hyphomicrobiaceae             | 0.7                |     |
|                                 |                  |                       |                  | Rhodobacterales     | Rhodobacteraceae              | 5.0                |     |
|                                 |                  | Betaproteobacteria    |                  | Burkholderiales     | Comamonadaceae                | 11.4               |     |
|                                 |                  |                       |                  |                     | Oxalobacteraceae              | 8.3                |     |
|                                 |                  |                       |                  |                     | Rhodocyclales                 | Rhodocyclaceae     | 0.9 |
|                                 |                  | Deltaproteobacteria   |                  | Myxococcales        | Other                         | 0.3                |     |
|                                 |                  | Epsilonproteobacteria |                  | Campylobacterales   | Campylobacteraceae            | 1.5                |     |
|                                 |                  | Gammaproteobacteria   |                  |                     | Aeromonadales                 | Aeromonadaceae     | 1.4 |
|                                 |                  |                       |                  |                     | Alteromonadales               | [Chromatiaceae]    | 1.4 |
|                                 |                  |                       |                  |                     |                               | Alteromonadaceae   | 0.4 |
|                                 |                  |                       |                  |                     | Enterobacteriales             | Enterobacteriaceae | 6.2 |
| Pseudomonadales                 |                  |                       |                  |                     | Moraxellaceae                 | 5.7                |     |
|                                 | Pseudomonadaceae | 17.0                  |                  |                     |                               |                    |     |



| <b>Sample Type</b> | <b>Phylum</b>    | <b>Class</b>        | <b>Order</b>     | <b>Family</b>       | <b>Relative Abundance (%)</b> |     |
|--------------------|------------------|---------------------|------------------|---------------------|-------------------------------|-----|
| Street Sweeping    | Actinobacteria   | Thermoleophilia     | Gaiellales       | Gaiellaceae         | 0.2                           |     |
|                    | Bacteroidetes    | [Saprosirae]        | [Saprosirales]   | Chitinophagaceae    | 1.7                           |     |
|                    |                  | Flavobacteriia      | Flavobacteriales | Flavobacteriaceae   | 1.2                           |     |
|                    | Cyanobacteria    | Chloroplast         | Streptophyta     | Other               | 5.9                           |     |
|                    | Firmicutes       | Bacilli             | Bacillales       | [Exiguobacteraceae] | 0.6                           |     |
|                    |                  |                     |                  | Paenibacillaceae    | 0.9                           |     |
|                    |                  |                     | Lactobacillales  | Enterococcaceae     | 0.2                           |     |
|                    |                  |                     |                  | Streptococcaceae    | 0.3                           |     |
|                    | Other            | Other               | Other            | Other               | 2.8                           |     |
|                    | Proteobacteria   | Alphaproteobacteria | Rhizobiales      | Hyphomicrobiaceae   | 1.3                           |     |
|                    |                  |                     | Rhodobacterales  | Rhodobacteraceae    | 8.1                           |     |
|                    |                  | Betaproteobacteria  | Burkholderiales  | Comamonadaceae      | 7.3                           |     |
|                    |                  |                     |                  | Oxalobacteraceae    | 7.0                           |     |
|                    |                  |                     | Rhodocyclales    | Rhodocyclaceae      | 1.3                           |     |
|                    |                  | Deltaproteobacteria | Myxococcales     | Other               | 2.2                           |     |
|                    |                  | Gammaproteobacteria |                  | Aeromonadales       | Aeromonadaceae                | 0.4 |
|                    |                  |                     |                  | Alteromonadales     | Alteromonadaceae              | 0.4 |
| Enterobacteriales  |                  |                     |                  | Enterobacteriaceae  | 7.3                           |     |
| Pseudomonadales    |                  |                     |                  | Moraxellaceae       | 1.2                           |     |
|                    | Pseudomonadaceae | 4.7                 |                  |                     |                               |     |

| <b>Sample Type</b> | <b>Phylum</b>    | <b>Class</b>           | <b>Order</b>       | <b>Family</b>       | <b>Relative Abundance (%)</b> |
|--------------------|------------------|------------------------|--------------------|---------------------|-------------------------------|
| Holmes Lake        | Actinobacteria   | Actinobacteria         | Actinomycetales    | ACK-M1              | 6.4                           |
|                    | Bacteroidetes    | [Saprospirae]          | [Saprospirales]    | Chitinophagaceae    | 6.3                           |
|                    |                  | Flavobacteriia         | Flavobacteriales   | Flavobacteriaceae   | 1.9                           |
|                    | Cyanobacteria    | Oscillatorioophycideae | Chroococcales      | Microcystaceae      | 8.9                           |
|                    | Firmicutes       | Bacilli                | Bacillales         | [Exiguobacteraceae] | 0.2                           |
|                    |                  | Erysipelotrichi        | Erysipelotrichales | Erysipelotrichaceae | 0.4                           |
|                    | Other            | Other                  | Other              | Other               | 0.5                           |
|                    | Proteobacteria   | Alphaproteobacteria    | Rhizobiales        | Hyphomicrobiaceae   | 0.2                           |
|                    |                  |                        | Rhodobacterales    | Rhodobacteraceae    | 3.9                           |
|                    |                  | Betaproteobacteria     | Burkholderiales    | Comamonadaceae      | 10.7                          |
|                    |                  |                        |                    | Oxalobacteraceae    | 4.4                           |
|                    |                  |                        | Rhodocyclales      | Rhodocyclaceae      | 1.1                           |
|                    |                  | Deltaproteobacteria    | Myxococcales       | Other               | 1.3                           |
|                    |                  | Epsilonproteobacteria  | Campylobacterales  | Campylobacteraceae  | 0.4                           |
|                    |                  | Gammaproteobacteria    | Aeromonadales      | Aeromonadaceae      | 0.3                           |
|                    |                  |                        | Alteromonadales    | [Chromatiaceae]     | 0.6                           |
|                    |                  |                        | Enterobacteriales  | Enterobacteriaceae  | 0.1                           |
| Pseudomonadales    | Moraxellaceae    |                        | 0.1                |                     |                               |
|                    | Pseudomonadaceae |                        | 0.9                |                     |                               |

| <b>Sample Type</b> | <b>Phylum</b>   | <b>Class</b>        | <b>Order</b>       | <b>Family</b>       | <b>Relative Abundance (%)</b> |                  |
|--------------------|-----------------|---------------------|--------------------|---------------------|-------------------------------|------------------|
| Streambed Sediment | Actinobacteria  | Thermoleophilia     | Gaiellales         | Gaiellaceae         | 0.2                           |                  |
|                    | Bacteroidetes   | [Saprosirae]        | [Saprosirales]     | Chitinophagaceae    | 3.1                           |                  |
|                    |                 | Bacteroidia         | Bacteroidales      | Other               | 1.8                           |                  |
|                    |                 | Flavobacteriia      | Flavobacteriales   | Flavobacteriaceae   | 1.3                           |                  |
|                    | Firmicutes      | Erysipelotrichi     | Erysipelotrichales | Erysipelotrichaceae | 0.4                           |                  |
|                    | Other           | Other               | Other              | Other               | 1.5                           |                  |
|                    | Proteobacteria  | Alphaproteobacteria | Rhodobacterales    | Rhodobacterales     | Hyphomicrobiaceae             | 1.4              |
|                    |                 |                     | Rhodocyclales      | Rhodocyclales       | Rhodobacteraceae              | 8.5              |
|                    |                 | Betaproteobacteria  | Burkholderiales    | Burkholderiales     | Comamonadaceae                | 17.2             |
|                    |                 |                     | Rhodocyclales      | Rhodocyclales       | Oxalobacteraceae              | 0.4              |
|                    |                 |                     | Rhodocyclales      | Rhodocyclales       | Rhodocyclaceae                | 8.1              |
|                    |                 | Deltaproteobacteria | Myxococcales       | Myxococcales        | Other                         | 0.9              |
|                    |                 | Gammaproteobacteria | Aeromonadales      | Aeromonadales       | Aeromonadaceae                | 0.2              |
|                    |                 |                     | Alteromonadales    | Alteromonadales     | [Chromatiaceae]               | 0.1              |
|                    |                 |                     |                    | Alteromonadales     | Alteromonadales               | Alteromonadaceae |
|                    |                 |                     | Pseudomonadales    | Pseudomonadales     | Moraxellaceae                 | 1.2              |
|                    | Pseudomonadales | Pseudomonadales     | Pseudomonadales    | Pseudomonadaceae    | 0.3                           |                  |
| Spirochaetes       | Spirochaetes    | Spirochaetales      | Spirochaetaceae    | 0.2                 |                               |                  |

| <b>Sample Type</b> | <b>Phylum</b>    | <b>Class</b>        | <b>Order</b>     | <b>Family</b>         | <b>Relative Abundance (%)</b> |                    |     |
|--------------------|------------------|---------------------|------------------|-----------------------|-------------------------------|--------------------|-----|
| Erodible Soil      | Actinobacteria   | Thermoleophilia     | Gaiellales       | Gaiellaceae           | 1.4                           |                    |     |
|                    | Bacteroidetes    | [Saprosirae]        | [Saprosirales]   | Chitinophagaceae      | 3.9                           |                    |     |
|                    |                  | Bacteroidia         | Bacteroidales    | Other                 | 0.7                           |                    |     |
|                    |                  | Flavobacteriia      | Flavobacteriales | Flavobacteriaceae     | 0.6                           |                    |     |
|                    | Cyanobacteria    | Chloroplast         | Streptophyta     | Other                 | 0.4                           |                    |     |
|                    | Firmicutes       | Clostridia          | Clostridiales    | Clostridiaceae        | 0.2                           |                    |     |
|                    |                  |                     |                  | Peptostreptococcaceae | 0.1                           |                    |     |
|                    | Other            | Other               | Other            | Other                 | 0.3                           |                    |     |
|                    | Proteobacteria   | Alphaproteobacteria |                  | Rhizobiales           | Hyphomicrobiaceae             | 3.3                |     |
|                    |                  |                     |                  | Rhodobacterales       | Rhodobacteraceae              | 1.4                |     |
|                    |                  | Betaproteobacteria  |                  | Burkholderiales       | Comamonadaceae                | 4.5                |     |
|                    |                  |                     |                  |                       | Oxalobacteraceae              | 0.8                |     |
|                    |                  |                     |                  |                       | Rhodocyclales                 | Rhodocyclaceae     | 1.3 |
|                    |                  | Deltaproteobacteria |                  | Myxococcales          | Other                         | 6.0                |     |
|                    |                  | Gammaproteobacteria |                  |                       | Aeromonadales                 | Aeromonadaceae     | 0.1 |
|                    |                  |                     |                  |                       | Alteromonadales               | Alteromonadaceae   | 0.4 |
|                    |                  |                     |                  |                       | Enterobacteriales             | Enterobacteriaceae | 0.1 |
| Pseudomonadales    |                  |                     |                  |                       | Moraxellaceae                 | 0.2                |     |
|                    | Pseudomonadaceae |                     |                  |                       | 0.4                           |                    |     |

| <b>Sample Type</b> | <b>Phylum</b>    | <b>Class</b>        | <b>Order</b>     | <b>Family</b>     | <b>Relative Abundance (%)</b> |
|--------------------|------------------|---------------------|------------------|-------------------|-------------------------------|
| Embankment Soil    | Actinobacteria   | Thermoleophilia     | Gaiellales       | Gaiellaceae       | 5.3                           |
|                    | Bacteroidetes    | [Saprospirae]       | [Saprospirales]  | Chitinophagaceae  | 3.7                           |
|                    |                  | Flavobacteriia      | Flavobacteriales | Flavobacteriaceae | 0.1                           |
|                    | Cyanobacteria    | Chloroplast         | Streptophyta     | Other             | 0.5                           |
|                    | Other            | Other               | Other            | Other             | 0.1                           |
|                    | Proteobacteria   | Alphaproteobacteria | Rhizobiales      | Hyphomicrobiaceae | 5.3                           |
|                    |                  |                     | Rhodobacterales  | Rhodobacteraceae  | 1.1                           |
|                    |                  | Betaproteobacteria  | Burkholderiales  | Comamonadaceae    | 3.6                           |
|                    |                  |                     |                  | Oxalobacteraceae  | 1.5                           |
|                    |                  |                     | Rhodocyclales    | Rhodocyclaceae    | 0.2                           |
|                    |                  | Deltaproteobacteria | Myxococcales     | Other             | 3.0                           |
|                    |                  | Gammaproteobacteria | Alteromonadales  | Alteromonadaceae  | 0.1                           |
|                    |                  |                     | Pseudomonadales  | Moraxellaceae     | 0.2                           |
|                    | Pseudomonadaceae |                     |                  | 0.6               |                               |

| <b>Sample Type</b> | <b>Phylum</b>    | <b>Class</b>          | <b>Order</b>        | <b>Family</b>         | <b>Relative Abundance (%)</b> |
|--------------------|------------------|-----------------------|---------------------|-----------------------|-------------------------------|
| Sanitary Sewage    | Bacteroidetes    | Bacteroidia           | Bacteroidales       | Bacteroidaceae        | 2.5                           |
|                    |                  | Flavobacteriia        | Flavobacteriales    | Flavobacteriaceae     | 0.6                           |
|                    | Firmicutes       | Bacilli               | Lactobacillales     | Enterococcaceae       | 3.4                           |
|                    |                  |                       |                     | Streptococcaceae      | 4.3                           |
|                    |                  | Clostridia            | Clostridiales       | Clostridiaceae        | 0.2                           |
|                    |                  |                       |                     | Lachnospiraceae       | 1.5                           |
|                    |                  |                       |                     | Peptostreptococcaceae | 0.6                           |
|                    |                  |                       |                     | Ruminococcaceae       | 2.4                           |
|                    |                  |                       |                     | Veillonellaceae       | 0.2                           |
|                    | Erysipelotrichi  | Erysipelotrichales    | Erysipelotrichaceae | 0.3                   |                               |
|                    | Fusobacteria     | Fusobacteriia         | Fusobacteriales     | Fusobacteriaceae      | 0.1                           |
|                    |                  |                       |                     | Leptotrichiaceae      | 6.9                           |
|                    | Proteobacteria   | Alphaproteobacteria   | Rhodobacterales     | Rhodobacteraceae      | 0.5                           |
|                    |                  | Betaproteobacteria    | Burkholderiales     | Comamonadaceae        | 8.3                           |
|                    |                  |                       | Rhodocyclales       | Rhodocyclaceae        | 1.9                           |
|                    |                  | Epsilonproteobacteria | Campylobacterales   | Campylobacteraceae    | 23.2                          |
|                    |                  | Gammaproteobacteria   | Aeromonadales       | Aeromonadaceae        | 5.7                           |
| Enterobacteriales  |                  |                       |                     | Enterobacteriaceae    | 1.5                           |
| Pseudomonadales    |                  |                       |                     | Moraxellaceae         | 17.4                          |
|                    | Pseudomonadaceae |                       |                     | 1.5                   |                               |

| <b>Sample Type</b> | <b>Phylum</b>   | <b>Class</b>        | <b>Order</b>        | <b>Family</b>         | <b>Relative Abundance (%)</b> |
|--------------------|-----------------|---------------------|---------------------|-----------------------|-------------------------------|
| Dog Feces          | Actinobacteria  | Coriobacteriia      | Coriobacteriales    | Coriobacteriaceae     | 5.5                           |
|                    | Bacteroidetes   | Bacteroidia         | Bacteroidales       | Bacteroidaceae        | 10.9                          |
|                    | Firmicutes      | Bacilli             | Lactobacillales     | Enterococcaceae       | 0.5                           |
|                    |                 |                     |                     | Lactobacillaceae      | 0.1                           |
|                    |                 |                     |                     | Streptococcaceae      | 11.9                          |
|                    |                 | Clostridia          | Clostridiales       | Clostridiaceae        | 12.0                          |
|                    |                 |                     |                     | Lachnospiraceae       | 15.9                          |
|                    |                 |                     |                     | Peptostreptococcaceae | 3.3                           |
|                    |                 |                     |                     | Ruminococcaceae       | 8.9                           |
|                    | Erysipelotrichi | Erysipelotrichales  | Erysipelotrichaceae | 9.1                   |                               |
|                    | Fusobacteria    | Fusobacteriia       | Fusobacteriales     | Fusobacteriaceae      | 0.1                           |
|                    | Proteobacteria  | Gammaproteobacteria | Enterobacteriales   | Enterobacteriaceae    | 2.4                           |
|                    |                 |                     | Legionellales       | Coxiellaceae          | 7.3                           |
|                    |                 |                     | Pseudomonadales     | Moraxellaceae         | 4.8                           |
| Pseudomonadaceae   | 0.1             |                     |                     |                       |                               |
| Spirochaetes       | Spirochaetes    | Spirochaetales      | Spirochaetaceae     | 1.0                   |                               |

| <b>Sample Type</b>  | <b>Phylum</b>  | <b>Class</b>          | <b>Order</b>       | <b>Family</b>         | <b>Relative Abundance (%)</b> |
|---------------------|----------------|-----------------------|--------------------|-----------------------|-------------------------------|
| Duck Feces          | Actinobacteria | Coriobacteriia        | Coriobacteriales   | Coriobacteriaceae     | 0.3                           |
|                     | Bacteroidetes  | Bacteroidia           | Bacteroidales      | Bacteroidaceae        | 0.6                           |
|                     |                | Flavobacteriia        | Flavobacteriales   | Flavobacteriaceae     | 0.1                           |
|                     | Cyanobacteria  | Chloroplast           | Streptophyta       | Other                 | 0.1                           |
|                     | Firmicutes     | Bacilli               | Bacillales         | [Exiguobacteraceae]   | 0.2                           |
|                     |                |                       |                    | Other                 | 0.5                           |
|                     |                |                       |                    | Paenibacillaceae      | 0.1                           |
|                     |                |                       | Lactobacillales    | Enterococcaceae       | 3.1                           |
|                     |                |                       | Lactobacillaceae   | 0.3                   |                               |
|                     |                |                       | Streptococcaceae   | 0.7                   |                               |
|                     |                | Clostridia            | Clostridiales      | Clostridiaceae        | 14.4                          |
|                     |                |                       |                    | Lachnospiraceae       | 3.5                           |
|                     |                |                       |                    | Peptostreptococcaceae | 6.9                           |
|                     |                |                       |                    | Ruminococcaceae       | 0.7                           |
|                     |                | Erysipelotrichi       | Erysipelotrichales | Erysipelotrichaceae   | 2.2                           |
|                     | Fusobacteria   | Fusobacteriia         | Fusobacteriales    | Leptotrichiaceae      | 1.6                           |
|                     | Proteobacteria | Alphaproteobacteria   | Rhodobacterales    | Rhodobacteraceae      | 0.4                           |
|                     |                | Betaproteobacteria    | Burkholderiales    | Comamonadaceae        | 2.9                           |
|                     |                |                       | Rhodocyclales      | Rhodocyclaceae        | 0.6                           |
|                     |                | Epsilonproteobacteria | Campylobacterales  | Campylobacteraceae    | 4.4                           |
| Gammaproteobacteria |                | Aeromonadales         | Aeromonadaceae     | 2.4                   |                               |
|                     |                | Enterobacteriales     | Enterobacteriaceae | 27.6                  |                               |
|                     |                | Legionellales         | Coxiellaceae       | 6.0                   |                               |
|                     |                | Pseudomonadales       | Moraxellaceae      | 7.7                   |                               |
| Pseudomonadaceae    | 0.3            |                       |                    |                       |                               |



| <b>Sample Type</b> | <b>Phylum</b>   | <b>Class</b>        | <b>Order</b>        | <b>Family</b>      | <b>Relative Abundance (%)</b> |
|--------------------|-----------------|---------------------|---------------------|--------------------|-------------------------------|
| Horse Feces        | Bacteroidetes   | Bacteroidia         | Bacteroidales       | Bacteroidaceae     | 1.6                           |
|                    |                 |                     |                     | Other              | 34.1                          |
|                    | Fibrobacteres   | Fibrobacteria       | Fibrobacterales     | Fibrobacteraceae   | 6.9                           |
|                    | Firmicutes      | Bacilli             | Lactobacillales     | Lactobacillaceae   | 0.2                           |
|                    |                 |                     |                     | Streptococcaceae   | 0.7                           |
|                    |                 | Clostridia          | Clostridiales       | Clostridiaceae     | 0.9                           |
|                    |                 |                     |                     | Lachnospiraceae    | 0.9                           |
|                    |                 |                     |                     | Ruminococcaceae    | 9.3                           |
|                    |                 |                     |                     | Veillonellaceae    | 0.6                           |
|                    | Erysipelotrichi | Erysipelotrichales  | Erysipelotrichaceae | 0.3                |                               |
|                    | Other           | Other               | Other               | Other              | 2.6                           |
|                    | Proteobacteria  | Gammaproteobacteria | Enterobacteriales   | Enterobacteriaceae | 0.3                           |
|                    |                 |                     | Pseudomonadales     | Moraxellaceae      | 1.4                           |
|                    | Spirochaetes    | Spirochaetes        | Spirochaetales      | Spirochaetaceae    | 17.0                          |
| Verrucomicrobia    | Verruco-5       | WCHB1-41            | RFP12               | 10.0               |                               |

| <b>Sample Type</b> | <b>Phylum</b>    | <b>Class</b>        | <b>Order</b>     | <b>Family</b>       | <b>Relative Abundance (%)</b> |     |
|--------------------|------------------|---------------------|------------------|---------------------|-------------------------------|-----|
| Pigeon Feces       | Actinobacteria   | Actinobacteria      | Actinomycetales  | Corynebacteriaceae  | 5.3                           |     |
|                    | Bacteroidetes    | [Saprospirae]       | [Saprospirales]  | Chitinophagaceae    | 0.3                           |     |
|                    | Cyanobacteria    | Chloroplast         | Streptophyta     | Other               | 0.7                           |     |
|                    | Firmicutes       | Bacilli             | Bacillales       | [Exiguobacteraceae] | 0.2                           |     |
|                    |                  |                     |                  | Other               | 0.1                           |     |
|                    |                  |                     |                  | Paenibacillaceae    | 6.1                           |     |
|                    |                  |                     | Lactobacillales  | Enterococcaceae     | 8.8                           |     |
|                    |                  |                     | Lactobacillaceae | 17.5                |                               |     |
|                    |                  |                     | Clostridia       | Clostridiales       | Veillonellaceae               | 8.0 |
|                    |                  |                     | Erysipelotrichi  | Erysipelotrichales  | Erysipelotrichaceae           | 0.8 |
|                    | Proteobacteria   | Alphaproteobacteria | Rhizobiales      | Hyphomicrobiaceae   | 0.8                           |     |
|                    |                  |                     | Rhodobacterales  | Rhodobacteraceae    | 0.5                           |     |
|                    |                  | Betaproteobacteria  | Burkholderiales  | Comamonadaceae      | 1.5                           |     |
|                    |                  |                     |                  | Oxalobacteraceae    | 4.1                           |     |
|                    |                  | Gammaproteobacteria |                  | Alteromonadales     | Alteromonadaceae              | 1.3 |
| Enterobacteriales  |                  |                     |                  | Enterobacteriaceae  | 15.7                          |     |
| Pseudomonadales    |                  |                     |                  | Moraxellaceae       | 12.2                          |     |
|                    | Pseudomonadaceae | 1.0                 |                  |                     |                               |     |

| <b>Sample Type</b>  | <b>Phylum</b>  | <b>Class</b>          | <b>Order</b>       | <b>Family</b>         | <b>Relative Abundance (%)</b> |
|---------------------|----------------|-----------------------|--------------------|-----------------------|-------------------------------|
| Goose Feces         | Actinobacteria | Coriobacteriia        | Coriobacteriales   | Coriobacteriaceae     | 2.4                           |
|                     | Bacteroidetes  | [Saprospirae]         | [Saprospirales]    | Chitinophagaceae      | 0.4                           |
|                     |                | Bacteroidia           | Bacteroidales      | Bacteroidaceae        | 2.9                           |
|                     |                | Other                 |                    |                       | 1.2                           |
|                     | Flavobacteriia | Flavobacteriales      | Flavobacteriaceae  | 0.4                   |                               |
|                     | Cyanobacteria  | Chloroplast           | Streptophyta       | Other                 | 0.4                           |
|                     | Firmicutes     | Bacilli               | Bacillales         | [Exiguobacteraceae]   | 0.3                           |
|                     |                |                       |                    | Paenibacillaceae      | 0.6                           |
|                     |                |                       | Lactobacillales    | Enterococcaceae       | 5.5                           |
|                     |                |                       |                    | Streptococcaceae      | 0.2                           |
|                     |                | Clostridia            | Clostridiales      | Clostridiaceae        | 9.1                           |
|                     |                |                       |                    | Lachnospiraceae       | 2.9                           |
|                     |                |                       |                    | Peptostreptococcaceae | 9.0                           |
|                     |                |                       |                    | Ruminococcaceae       | 16.4                          |
|                     |                | Veillonellaceae       | 0.4                |                       |                               |
|                     |                | Erysipelotrichi       | Erysipelotrichales | Erysipelotrichaceae   | 4.3                           |
|                     | Fusobacteria   | Fusobacteriia         | Fusobacteriales    | Fusobacteriaceae      | 3.4                           |
|                     | Proteobacteria | Alphaproteobacteria   | Rhodobacterales    | Rhodobacteraceae      | 2.1                           |
|                     |                | Betaproteobacteria    | Burkholderiales    | Comamonadaceae        | 0.7                           |
|                     |                |                       |                    | Oxalobacteraceae      | 0.2                           |
|                     |                | Epsilonproteobacteria | Campylobacterales  | Campylobacteraceae    | 1.0                           |
| Gammaproteobacteria |                | Aeromonadales         | Aeromonadaceae     | 1.1                   |                               |
|                     |                |                       | Enterobacteriales  | Enterobacteriaceae    | 6.6                           |
|                     |                | Pseudomonadales       | Moraxellaceae      | 7.5                   |                               |
|                     |                |                       | Pseudomonadaceae   | 0.6                   |                               |

| <b>Sample Type</b> | <b>Phylum</b>    | <b>Class</b>        | <b>Order</b>        | <b>Family</b>      | <b>Relative Abundance (%)</b> |                    |      |
|--------------------|------------------|---------------------|---------------------|--------------------|-------------------------------|--------------------|------|
| Swallow Feces      | Actinobacteria   | Actinobacteria      | Actinomycetales     | Corynebacteriaceae | 0.6                           |                    |      |
|                    | Bacteroidetes    | Bacteroidia         | Bacteroidales       | Other              | 0.2                           |                    |      |
|                    | Cyanobacteria    | Chloroplast         | Streptophyta        | Other              | 1.0                           |                    |      |
|                    | Firmicutes       | Bacilli             |                     | Bacillales         | Other                         | 14.4               |      |
|                    |                  |                     |                     | Lactobacillales    | Enterococcaceae               | 10.7               |      |
|                    |                  | Lactobacillaceae    | 1.6                 |                    |                               |                    |      |
|                    |                  | Streptococcaceae    | 0.9                 |                    |                               |                    |      |
|                    |                  | Clostridia          |                     | Clostridiales      | Clostridiaceae                | 0.9                |      |
|                    |                  |                     |                     |                    | Lachnospiraceae               | 0.4                |      |
|                    |                  |                     |                     |                    | Ruminococcaceae               | 0.7                |      |
|                    | Erysipelotrichi  | Erysipelotrichales  | Erysipelotrichaceae | 0.1                |                               |                    |      |
|                    | Other            | Other               | Other               | Other              | 11.8                          |                    |      |
|                    | Proteobacteria   | Betaproteobacteria  |                     | Burkholderiales    | Comamonadaceae                | 0.1                |      |
|                    |                  |                     |                     |                    | Oxalobacteraceae              | 0.3                |      |
|                    |                  | Gammaproteobacteria |                     |                    | Alteromonadales               | Alteromonadaceae   | 1.9  |
|                    |                  |                     |                     |                    | Enterobacteriales             | Enterobacteriaceae | 25.6 |
| Legionellales      |                  |                     |                     |                    | Coxiellaceae                  | 0.8                |      |
| Pseudomonadales    |                  |                     |                     |                    | Moraxellaceae                 | 2.2                |      |
|                    | Pseudomonadaceae | 3.9                 |                     |                    |                               |                    |      |

| Sample Type        | Phylum         | Class                 | Order            | Family            | Relative Abundance (%) |                       |      |
|--------------------|----------------|-----------------------|------------------|-------------------|------------------------|-----------------------|------|
| Small Mammal Feces | Bacteroidetes  | [Saprospirae]         | [Saprospirales]  | Chitinophagaceae  | 0.2                    |                       |      |
|                    |                | Bacteroidia           | Bacteroidales    | Bacteroidaceae    | 10.3                   |                       |      |
|                    |                | Flavobacteriia        | Flavobacteriales | Flavobacteriaceae | 0.5                    |                       |      |
|                    | Firmicutes     | Bacilli               |                  | Bacillales        | [Exiguobacteraceae]    | 5.2                   |      |
|                    |                |                       |                  | Lactobacillales   | Enterococcaceae        | 0.8                   |      |
|                    |                | Clostridia            |                  | Clostridiales     |                        | Streptococcaceae      | 0.1  |
|                    |                |                       |                  |                   |                        | Clostridiaceae        | 7.0  |
|                    |                |                       |                  |                   |                        | Lachnospiraceae       | 4.5  |
|                    |                |                       |                  |                   |                        | Peptostreptococcaceae | 2.3  |
|                    |                |                       |                  |                   |                        | Veillonellaceae       | 0.3  |
|                    | Fusobacteria   | Fusobacteriia         | Fusobacteriales  | Fusobacteriaceae  | 9.8                    |                       |      |
|                    | Other          | Other                 | Other            | Other             | 1.0                    |                       |      |
|                    | Proteobacteria | Alphaproteobacteria   |                  | Rhizobiales       | Hyphomicrobiaceae      | 1.2                   |      |
|                    |                |                       |                  | Rhodobacterales   | Rhodobacteraceae       | 1.7                   |      |
|                    |                | Betaproteobacteria    |                  | Burkholderiales   | Comamonadaceae         | 3.9                   |      |
|                    |                | Epsilonproteobacteria |                  | Campylobacterales | Campylobacteraceae     | 1.8                   |      |
|                    |                | Gammaproteobacteria   |                  |                   | Aeromonadales          | Aeromonadaceae        | 2.4  |
|                    |                |                       |                  |                   | Alteromonadales        | [Chromatiaceae]       | 1.3  |
|                    |                |                       |                  |                   |                        | Alteromonadaceae      | 13.6 |
|                    |                |                       |                  |                   | Enterobacteriales      | Enterobacteriaceae    | 5.9  |
| Pseudomonadales    |                |                       |                  |                   | Moraxellaceae          | 1.9                   |      |
|                    |                | Pseudomonadaceae      | 2.4              |                   |                        |                       |      |

25 Table S4: Families with notable contributions (i.e., relative contribution > 0.50%) to the dry weather water in Antelope Creek.

| Source              | Phylum         | Class               | Order           | Family            | Relative Contribution (%) |                    |                   |      |
|---------------------|----------------|---------------------|-----------------|-------------------|---------------------------|--------------------|-------------------|------|
| Holmes Lake         | Actinobacteria | Actinobacteria      | Actinomycetales | ACK.M1            | 5.77                      |                    |                   |      |
|                     |                |                     |                 | Microbacteriaceae | 1.92                      |                    |                   |      |
|                     |                |                     |                 | Other             | 1.04                      |                    |                   |      |
|                     | Bacteroidetes  | Saprospirae.        | Saprospirales.  | Saprospirales.    | Chitinophagaceae          | 3.60               |                   |      |
|                     |                |                     |                 |                   | Cytophagia                | Cytophagales       | Cytophagaceae     | 1.53 |
|                     |                |                     |                 |                   | Flavobacteriia            | Flavobacteriales   | Flavobacteriaceae | 2.74 |
|                     |                |                     |                 |                   | Cryomorphaceae            | 1.19               |                   |      |
|                     |                |                     |                 |                   | Sphingobacteriia          | Sphingobacteriales | Other             | 1.83 |
|                     | Cyanobacteria  | Chloroplast         | Stramenopiles   | Other             | Other                     | 2.00               |                   |      |
|                     |                |                     |                 |                   | Oscillatoriothycideae     | Chroococcales      | Microcystaceae    | 2.82 |
|                     | Proteobacteria | Alphaproteobacteria |                 | Rhodobacterales   | Rhodobacteraceae          | 1.14               |                   |      |
|                     |                |                     |                 | Sphingomonadales  | Sphingomonadaceae         | 0.81               |                   |      |
|                     |                | Betaproteobacteria  |                 |                   | Burkholderiales           | Comamonadaceae     | 6.42              |      |
|                     |                |                     |                 |                   |                           | Oxalobacteraceae   | 0.92              |      |
|                     |                |                     |                 |                   |                           | Alcaligenaceae     | 0.85              |      |
|                     |                |                     |                 |                   |                           | Methylophilales    | Methylophilaceae  | 0.91 |
|                     |                |                     |                 |                   |                           | Rhodocyclales      | Rhodocyclaceae    | 0.56 |
| Gammaproteobacteria |                |                     |                 | Alteromonadales   | Chromatiaceae.            | 1.68               |                   |      |
|                     |                |                     |                 |                   | Pseudomonadales           | Pseudomonadaceae   | 0.60              |      |
|                     |                |                     |                 |                   | Xanthomonadales           | Xanthomonadaceae   | 1.46              |      |
| Streambed Sediment  | Proteobacteria | Betaproteobacteria  | Burkholderiales | Comamonadaceae    | 0.51                      |                    |                   |      |

26

27 Table S5: Families with notable contribution (i.e., relative contribution > 0.50%) to the rising limb of wet weather water in Antelope  
 28 Creek.

| Source                             | Phylum           | Class               | Order               | Family              | Relative Contribution (%) |
|------------------------------------|------------------|---------------------|---------------------|---------------------|---------------------------|
| Storm<br>Drain<br>Outfall<br>Water | Actinobacteria   | Actinobacteria      | Actinomycetales     | Micrococcaceae      | 2.75                      |
|                                    |                  |                     |                     | Microbacteriaceae   | 0.86                      |
|                                    |                  |                     |                     | Geodermatophilaceae | 0.80                      |
|                                    |                  |                     |                     | Nocardiaceae        | 0.59                      |
|                                    | Bacteroidetes    | Saprospirae         | Saprospirales       | Chitinophagaceae    | 0.85                      |
|                                    |                  |                     |                     | Cytophagia          | Cytophagales              |
|                                    |                  | Flavobacteriia      | Flavobacteriales    | Weeksellaceae.      | 1.13                      |
|                                    |                  |                     |                     | Flavobacteriaceae   | 0.70                      |
|                                    | Sphingobacteriia | Sphingobacteriales  | Sphingobacteriaceae | 3.37                |                           |
|                                    | Firmicutes       | Bacilli             | Bacillales          | Exiguobacteraceae   | 1.31                      |
|                                    |                  |                     |                     | Paenibacillaceae    | 0.59                      |
|                                    | Proteobacteria   | Alphaproteobacteria | Caulobacterales     | Caulobacteraceae    | 1.08                      |
|                                    |                  |                     |                     | Rhizobiales         | Rhizobiaceae              |
|                                    |                  |                     | Rhodobacterales     | Hyphomicrobiaceae   | 0.57                      |
|                                    |                  |                     |                     | Rhodobacteraceae    | 6.26                      |
|                                    |                  |                     |                     | Acetobacteraceae    | 0.80                      |
|                                    |                  |                     | Rhodospirillaceae   | 0.61                |                           |
|                                    |                  | Sphingomonadales    | Sphingomonadaceae   | 2.92                |                           |
|                                    |                  | Betaproteobacteria  | Burkholderiales     | Oxalobacteraceae    | 5.74                      |
|                                    |                  |                     |                     | Comamonadaceae      | 5.13                      |
|                                    |                  | Gammaproteobacteria | Alteromonadales     | Chromatiaceae.      | 0.89                      |
| Enterobacteriales                  |                  |                     |                     | Enterobacteriaceae  | 2.88                      |
| Pseudomonadales                    |                  |                     | Moraxellaceae       | 8.47                |                           |
|                                    |                  |                     | Pseudomonadaceae    | 3.29                |                           |
| Xanthomonadales                    | Xanthomonadaceae |                     | 0.98                |                     |                           |
| Unassigned                         | Unassigned       | Unassigned          | Unassigned          | 1.39                |                           |

29

30 Table S6: Families with notable contribution (i.e., relative contribution > 0.50%) the peak flow of wet weather water in Antelope  
 31 Creek.

| Source                       | Phylum         | Class               | Order              | Family              | Relative Contribution (%) |                   |                    |      |
|------------------------------|----------------|---------------------|--------------------|---------------------|---------------------------|-------------------|--------------------|------|
| Storm Drain<br>Outfall Water | Actinobacteria | Actinobacteria      | Actinomycetales    | Micrococcaceae      | 1.58                      |                   |                    |      |
|                              |                |                     |                    | Microbacteriaceae   | 0.53                      |                   |                    |      |
|                              | Bacteroidetes  |                     |                    |                     | Saprospirae.              | Saprospirales     | Chitinophagaceae   | 0.88 |
|                              |                |                     |                    |                     | Cytophagia                | Cytophagales      | Cytophagaceae      | 1.62 |
|                              |                |                     |                    |                     | Flavobacteriia            | Flavobacteriales  | Flavobacteriaceae  | 1.97 |
|                              |                |                     |                    |                     | Weeksellaceae.            | 0.79              |                    |      |
|                              |                | Sphingobacteriia    | Sphingobacteriales | Sphingobacteriaceae | 1.88                      |                   |                    |      |
|                              | Firmicutes     | Bacilli             | Bacillales         | Paenibacillaceae    | 1.07                      |                   |                    |      |
|                              | Proteobacteria | Alphaproteobacteria |                    |                     | Caulobacterales           | Caulobacteraceae  | 0.80               |      |
|                              |                |                     |                    |                     | Rhizobiales               | Rhizobiaceae      | 1.18               |      |
|                              |                |                     |                    |                     | Rhodobacterales           | Rhodobacteraceae  | 3.41               |      |
|                              |                |                     |                    |                     | Sphingomonadales          | Sphingomonadaceae | 2.57               |      |
|                              |                | Betaproteobacteria  |                    |                     |                           | Burkholderiales   | Comamonadaceae     | 9.55 |
|                              |                |                     |                    |                     |                           | Oxalobacteraceae  | 8.16               |      |
|                              |                |                     |                    |                     |                           | Neisseriales      | Neisseriaceae      | 0.67 |
|                              |                |                     | Rhodocyclales      | Rhodocyclaceae      | 0.70                      |                   |                    |      |
|                              |                | Gammaproteobacteria |                    |                     |                           | Aeromonadales     | Aeromonadaceae     | 3.05 |
|                              |                |                     |                    |                     |                           | Chromatiaceae.    | 2.44               |      |
|                              |                |                     |                    |                     |                           | Alteromonadaceae  | 0.54               |      |
|                              |                |                     |                    |                     |                           | Enterobacteriales | Enterobacteriaceae | 5.94 |
|                              |                |                     |                    |                     |                           | Pseudomonadales   | Moraxellaceae      | 7.77 |
|                              |                |                     |                    |                     |                           |                   | Pseudomonadaceae   | 7.06 |
|                              |                |                     |                    |                     |                           | Xanthomonadales   | Xanthomonadaceae   | 0.99 |
| Unassigned                   |                | Unassigned          | Unassigned         | Unassigned          | 0.69                      |                   |                    |      |

32



33 Table S7: Families with notable contribution (i.e., relative contribution > 0.50%) to the declining limb of wet weather water in  
 34 Antelope Creek.

| Source                          | Phylum         | Class               | Order               | Family              | Relative Contribution (%) |                  |
|---------------------------------|----------------|---------------------|---------------------|---------------------|---------------------------|------------------|
| Storm Drain<br>Outfall<br>Water | Bacteroidetes  | Saprospirae.        | Saprospirales.      | Chitinophagaceae    | 1.04                      |                  |
|                                 |                | Cytophagia          | Cytophagales        | Cytophagaceae       | 1.17                      |                  |
|                                 |                | Flavobacteriia      | Flavobacteriales    | Flavobacteriaceae   | 5.71                      |                  |
|                                 |                | Sphingobacteriia    | Sphingobacteriales  | Sphingobacteriaceae | 1.68                      |                  |
|                                 | Proteobacteria | Alphaproteobacteria | Sphingomonadales    | Sphingomonadales    | Sphingomonadaceae         | 2.66             |
|                                 |                |                     | Rhodobacterales     | Rhodobacterales     | Rhodobacteraceae          | 1.70             |
|                                 |                |                     | Rhizobiales         | Rhizobiales         | Rhizobiaceae              | 1.11             |
|                                 |                |                     | Caulobacterales     | Caulobacterales     | Caulobacteraceae          | 0.80             |
|                                 |                | Betaproteobacteria  | Rhodocyclales       | Rhodocyclales       | Rhodocyclaceae            | 0.83             |
|                                 |                |                     | Burkholderiales     | Comamonadaceae      | Comamonadaceae            | 18.65            |
|                                 |                |                     |                     | Oxalobacteraceae    | Oxalobacteraceae          | 5.05             |
|                                 |                |                     | Gammaproteobacteria | Pseudomonadales     | Pseudomonadales           | Pseudomonadaceae |
|                                 |                |                     |                     |                     | Moraxellaceae             | 2.18             |
|                                 |                | Enterobacteriales   |                     | Enterobacteriales   | Enterobacteriaceae        | 1.72             |
|                                 |                | Alteromonadales     |                     | Alteromonadales     | Chromatiaceae.            | 1.51             |
|                                 |                | Aeromonadales       |                     | Alteromonadaceae    | Alteromonadaceae          | 0.55             |
| Aeromonadaceae                  | Aeromonadaceae |                     | 1.27                |                     |                           |                  |
| Streambed<br>Sediment           | Proteobacteria | Betaproteobacteria  | Burkholderiales     | Comamonadaceae      | 0.77                      |                  |
| Holmes<br>Lake                  | Proteobacteria | Betaproteobacteria  | Burkholderiales     | Comamonadaceae      | 1.24                      |                  |

35

36 Table S8: Families with notable contribution (i.e., relative contribution > 0.50%) to the storm drain outfall water.

| Kingdom           | Phylum          | Class               | Order           | Family              | Relative Contribution (%) |                     |                     |                  |                   |                    |                  |      |
|-------------------|-----------------|---------------------|-----------------|---------------------|---------------------------|---------------------|---------------------|------------------|-------------------|--------------------|------------------|------|
| Street Sweepings  | Actinobacteria  | Actinobacteria      | Actinomycetales | Micrococcaceae      | 0.79                      |                     |                     |                  |                   |                    |                  |      |
|                   |                 |                     |                 | Geodermatophilaceae | 0.61                      |                     |                     |                  |                   |                    |                  |      |
|                   | Bacteroidetes   |                     |                 |                     | .Saprosirae.              | Saprosirales        | Chitinophagaceae    | 0.55             |                   |                    |                  |      |
|                   |                 |                     |                 |                     | Cytophagia                | Cytophagales        | Cytophagaceae       | 1.05             |                   |                    |                  |      |
|                   |                 |                     |                 |                     | Flavobacteriia            | Flavobacteriales    | Flavobacteriaceae   | 1.18             |                   |                    |                  |      |
|                   |                 |                     |                 |                     | Sphingobacteriia          | Sphingobacteriales  | Sphingobacteriaceae | 1.60             |                   |                    |                  |      |
|                   | Proteobacteria  | Alphaproteobacteria |                 |                     | Caulobacterales           | Caulobacteraceae    | 0.69                |                  |                   |                    |                  |      |
|                   |                 |                     |                 |                     | Rhizobiales               | Rhizobiaceae        | 1.34                |                  |                   |                    |                  |      |
|                   |                 |                     |                 |                     |                           | Hyphomicrobiaceae   | 0.60                |                  |                   |                    |                  |      |
|                   |                 |                     |                 |                     |                           | Rhodobacterales     | Rhodobacteraceae    | 4.07             |                   |                    |                  |      |
|                   |                 |                     |                 |                     | Sphingomonadales          | Sphingomonadaceae   | 2.17                |                  |                   |                    |                  |      |
|                   |                 |                     |                 |                     | Betaproteobacteria        | Burkholderiales     | Oxalobacteraceae    | 6.66             |                   |                    |                  |      |
|                   |                 |                     |                 |                     |                           |                     | Comamonadaceae      | 5.62             |                   |                    |                  |      |
|                   |                 |                     |                 |                     | Gammaproteobacteria       |                     |                     |                  | Enterobacteriales | Enterobacteriaceae | 3.15             |      |
|                   |                 |                     |                 |                     |                           |                     |                     |                  | Pseudomonadales   | Pseudomonadaceae   | 7.78             |      |
|                   | Moraxellaceae   | 1.79                |                 |                     |                           |                     |                     |                  |                   |                    |                  |      |
|                   | Xanthomonadales | Xanthomonadaceae    | 0.58            |                     |                           |                     |                     |                  |                   |                    |                  |      |
| Unassigned        | Unassigned      | Unassigned          | Unassigned      | Unassigned          | 0.63                      |                     |                     |                  |                   |                    |                  |      |
| Sanitary Sewage   | Proteobacteria  |                     |                 | Betaproteobacteria  | Burkholderiales           | Comamonadaceae      | 1.02                |                  |                   |                    |                  |      |
|                   |                 |                     |                 | Gammaproteobacteria | Pseudomonadales           | Moraxellaceae       | 0.87                |                  |                   |                    |                  |      |
| Unknown Source(s) | Bacteroidetes   |                     |                 |                     | .Saprosirae.              | Saprosirales        | Chitinophagaceae    | 0.52             |                   |                    |                  |      |
|                   |                 |                     |                 |                     | Cytophagia                | Cytophagales        | Cytophagaceae       | 1.23             |                   |                    |                  |      |
|                   |                 |                     |                 |                     | Flavobacteriia            | Flavobacteriales    | Flavobacteriaceae   | 0.90             |                   |                    |                  |      |
|                   |                 |                     |                 |                     | Sphingobacteriia          | Sphingobacteriales  | Sphingobacteriaceae | 0.85             |                   |                    |                  |      |
|                   | Proteobacteria  | Alphaproteobacteria |                 |                     |                           | Sphingomonadales    | Sphingomonadaceae   | 0.77             |                   |                    |                  |      |
|                   |                 |                     |                 |                     |                           | Betaproteobacteria  | Burkholderiales     | Comamonadaceae   | 0.84              |                    |                  |      |
|                   |                 |                     |                 |                     |                           |                     |                     | Oxalobacteraceae | 0.73              |                    |                  |      |
|                   |                 |                     |                 |                     |                           | Gammaproteobacteria |                     |                  |                   | Alteromonadales    | Chromatiaceae    | 0.76 |
|                   |                 |                     |                 |                     |                           |                     |                     |                  |                   | Pseudomonadales    | Pseudomonadaceae | 1.11 |
| Moraxellaceae     | 0.98            |                     |                 |                     |                           |                     |                     |                  |                   |                    |                  |      |

37

38 **FIGURES**

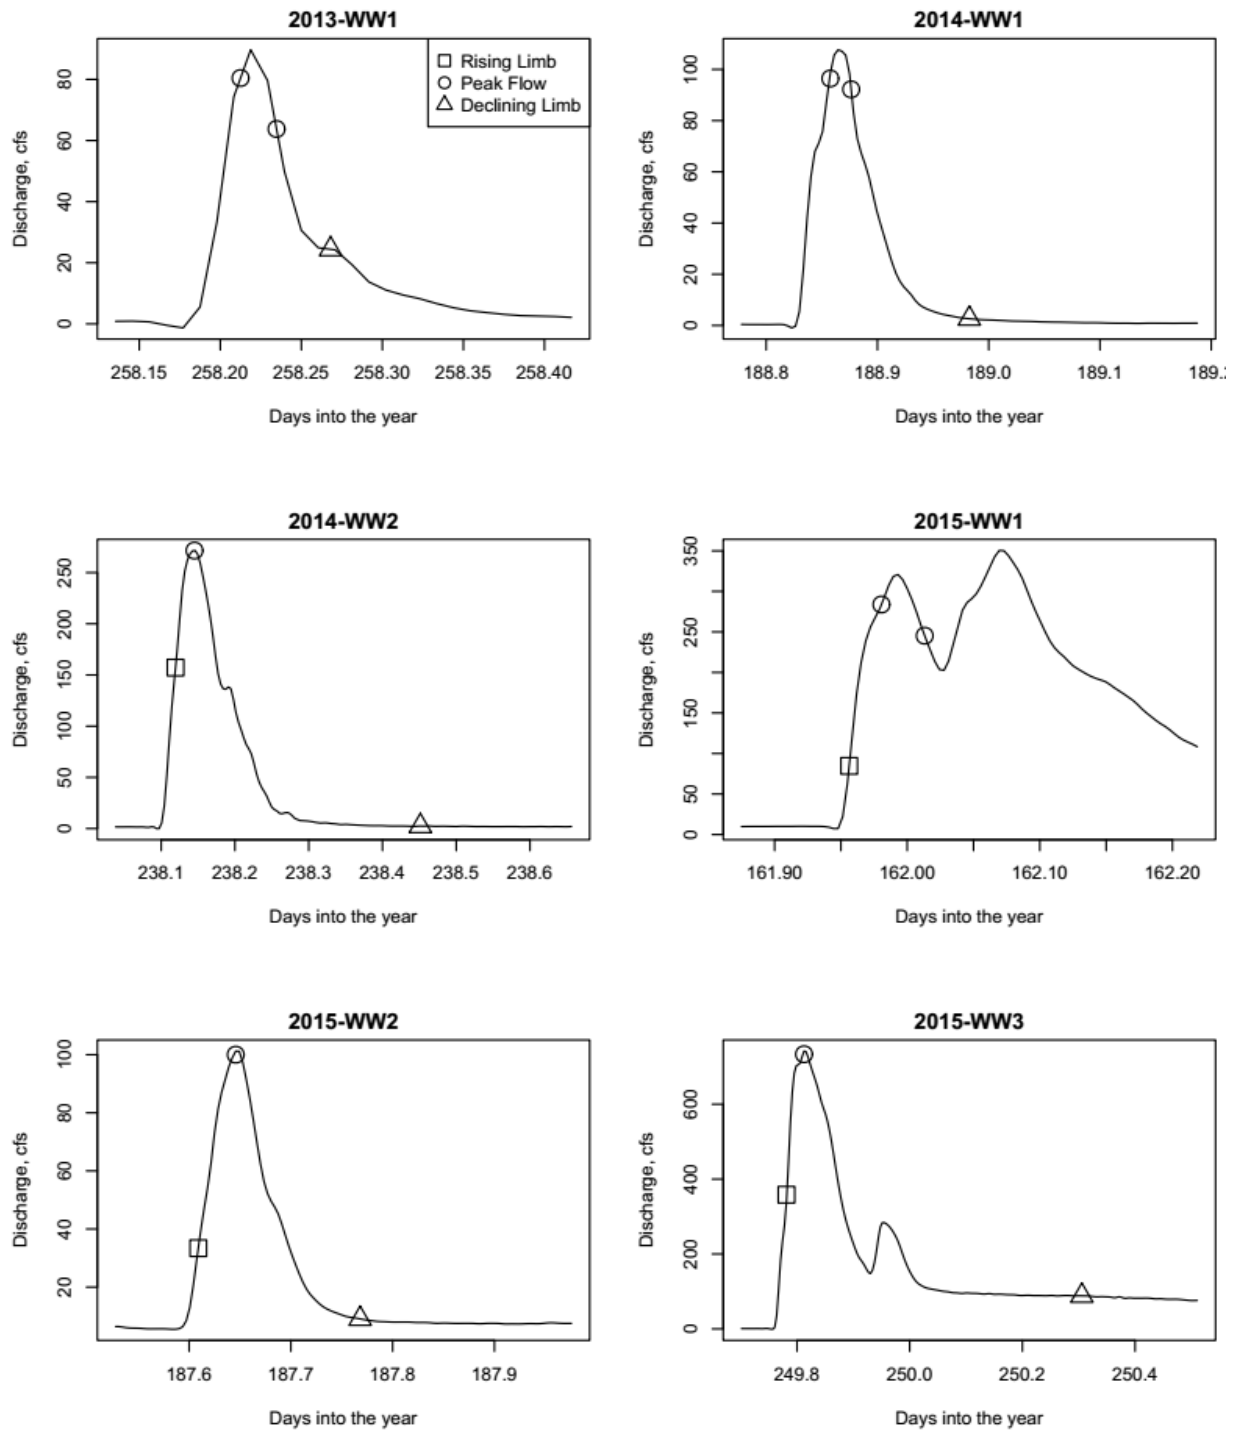

39

40 Figure S1: Hydrographs showing the times of sampling during the six wet weather events, one in

41 2013, two in 2014, and three in 2015.

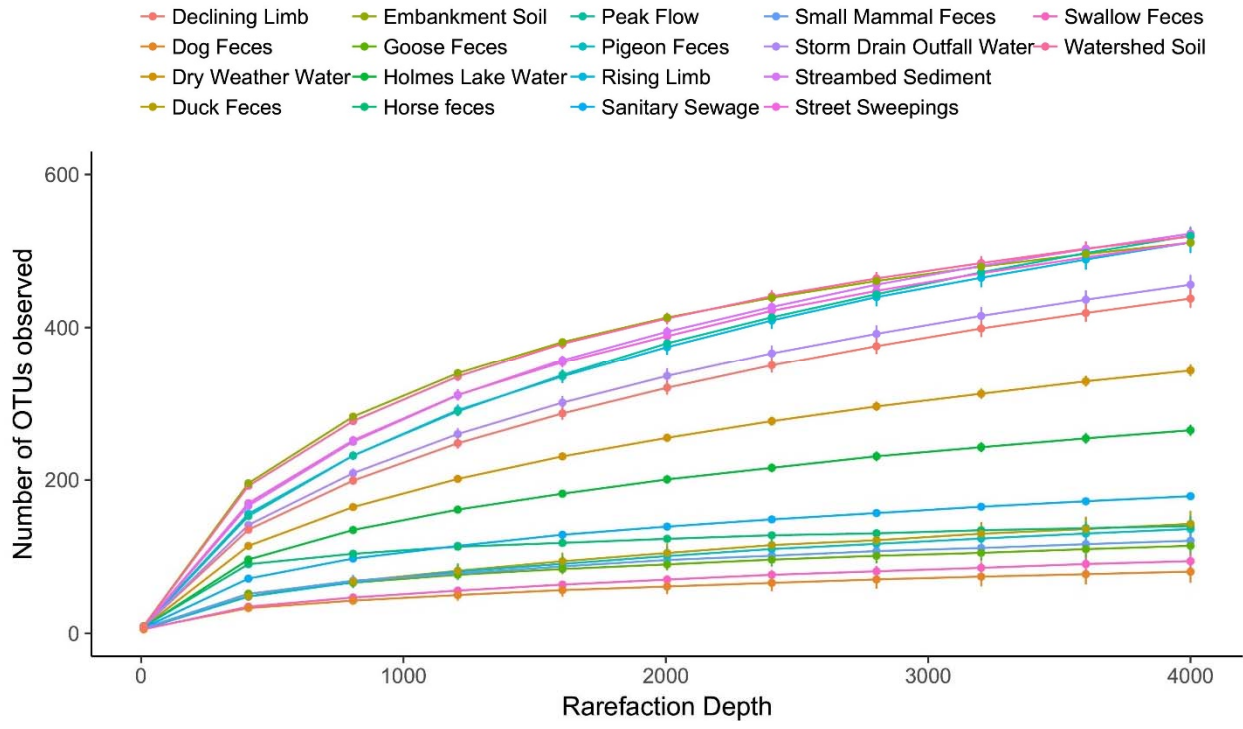

42

43 Figure S2: Rarefaction curve showing the number of OTUs observed at different rarefaction

44 depths. Error bars represent 95% confidence interval.

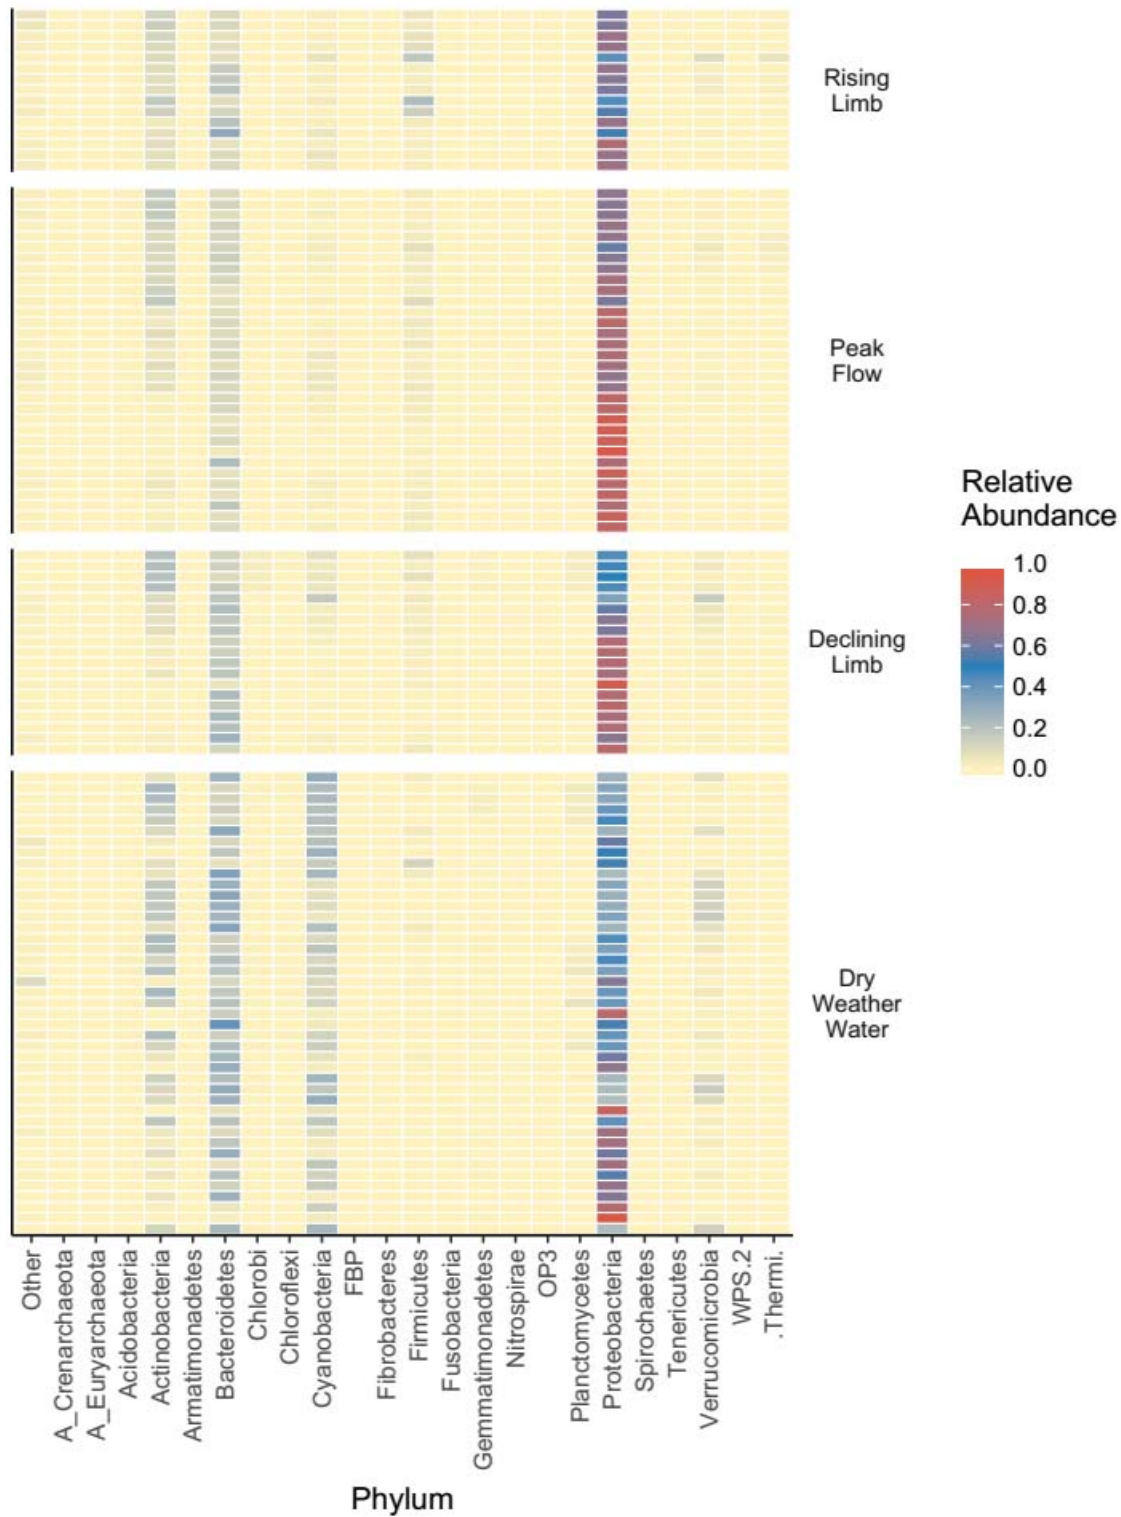

45

46 Figure S3: Heat map showing the relative abundance of major phyla in individual dry and wet

47 weather water samples.

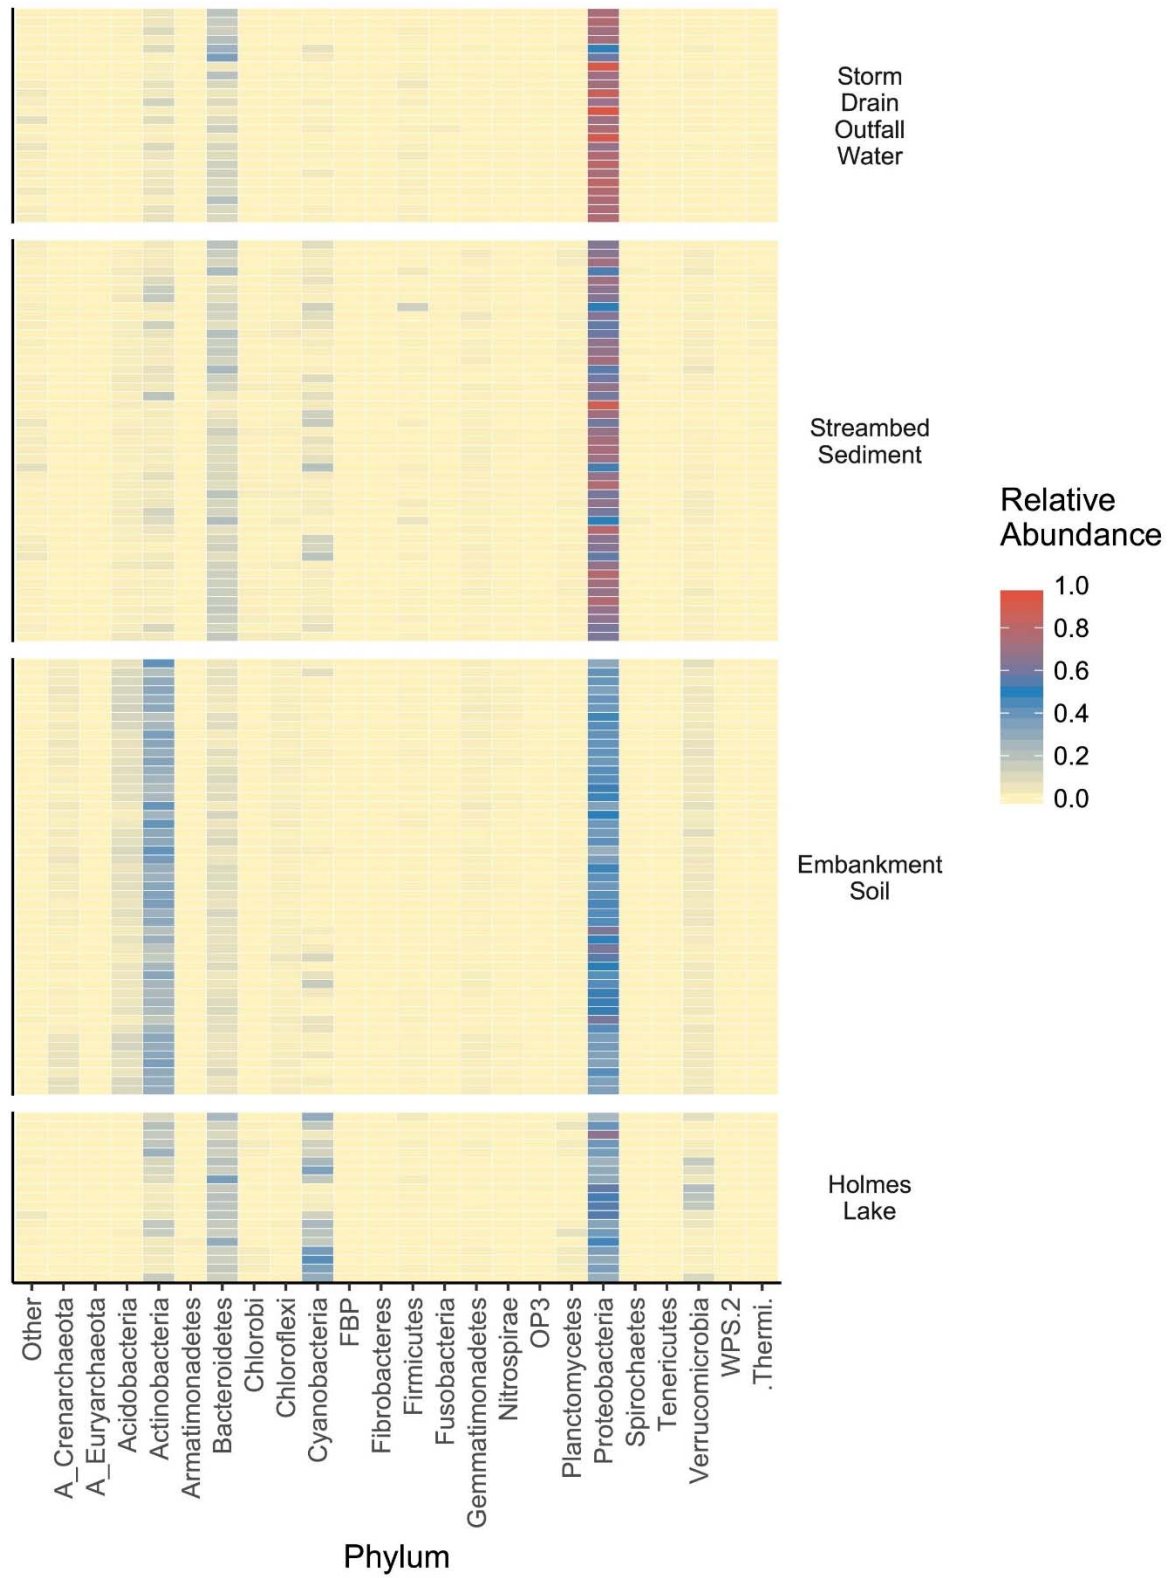

48

49 Figure S4: Heat map showing the relative abundance of major phyla in individual storm drain

50 outfall, streambed sediment, embankment soil, and Holmes Lake samples.



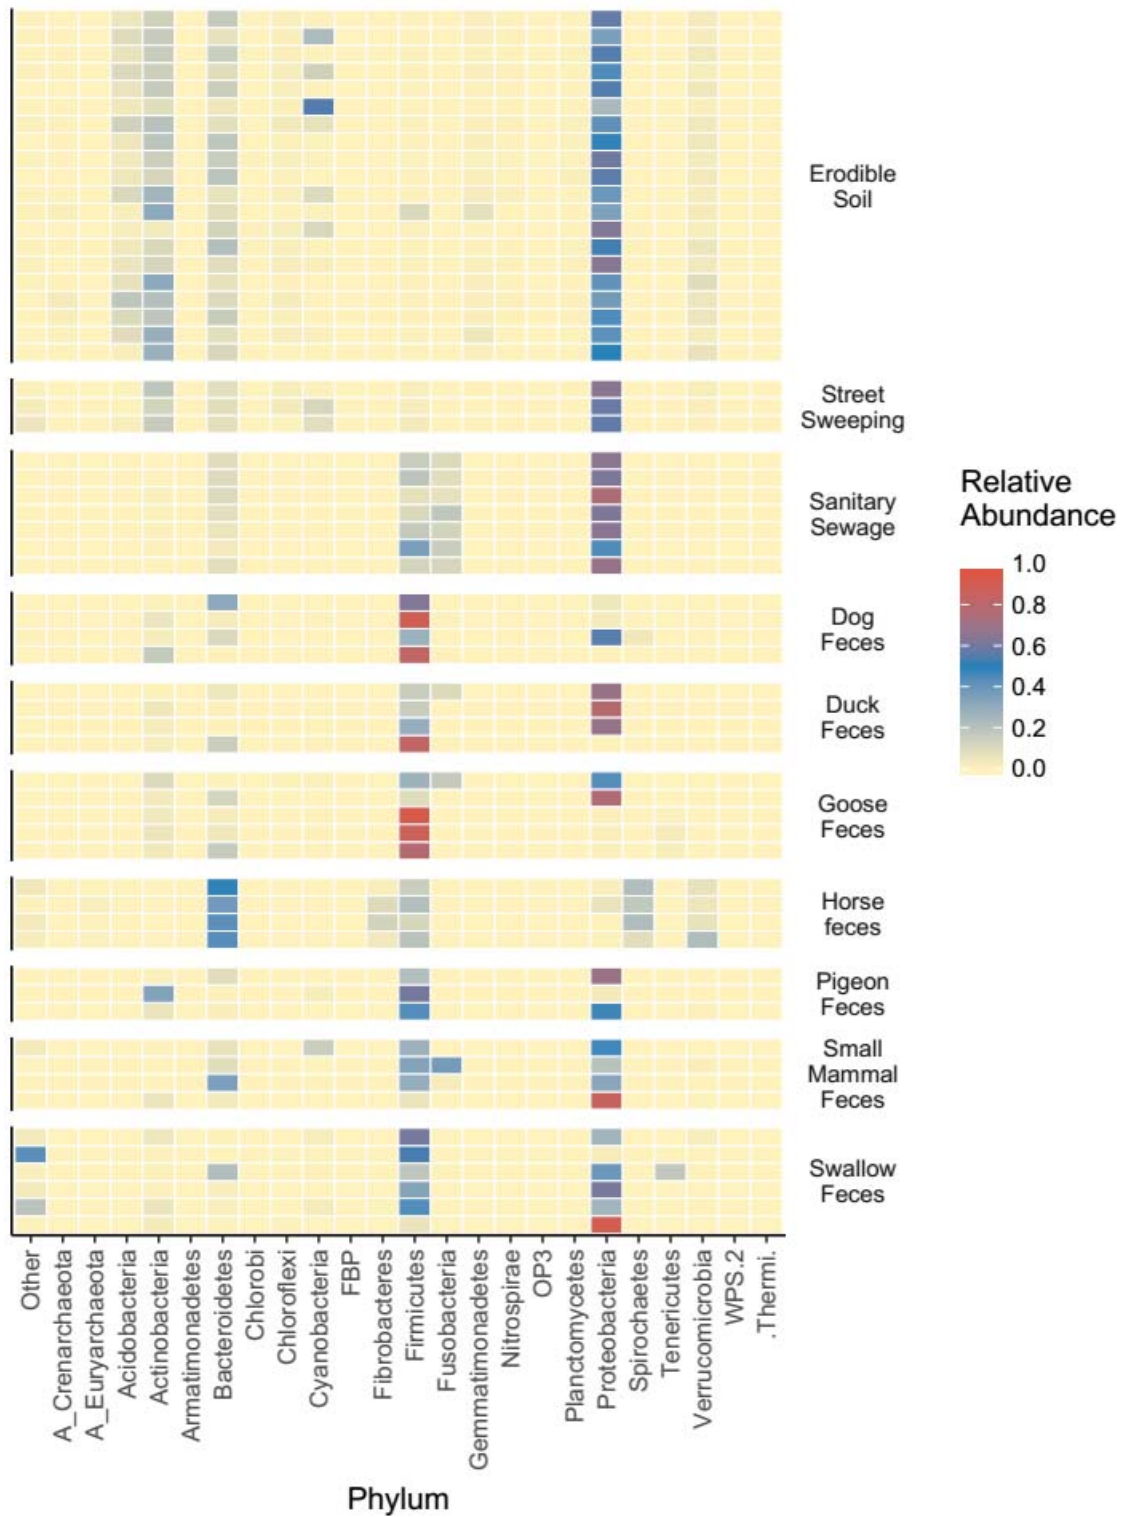

51

52 Figure S5: Heat map showing the relative abundance of major phyla in individual erodible soil,

53 street sweeping and fecal samples.

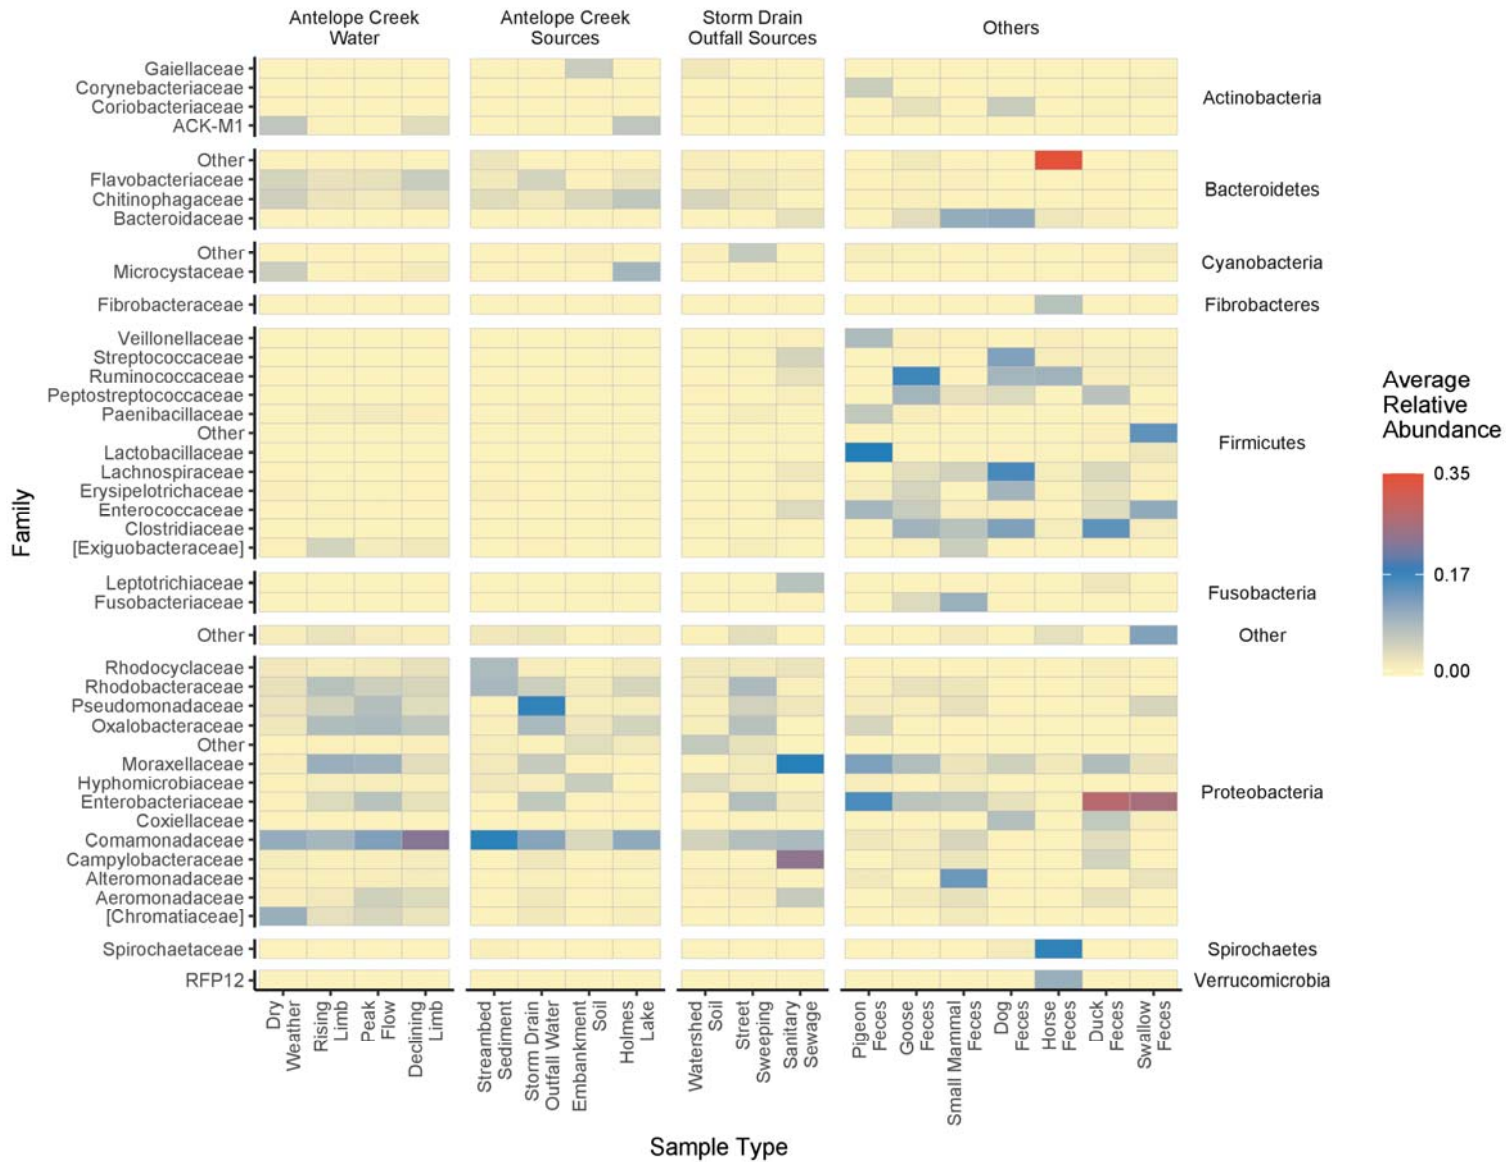

54

55

Figure S6: Heat map showing the families with relative abundance  $\geq 0.5\%$  in at least one sample type.



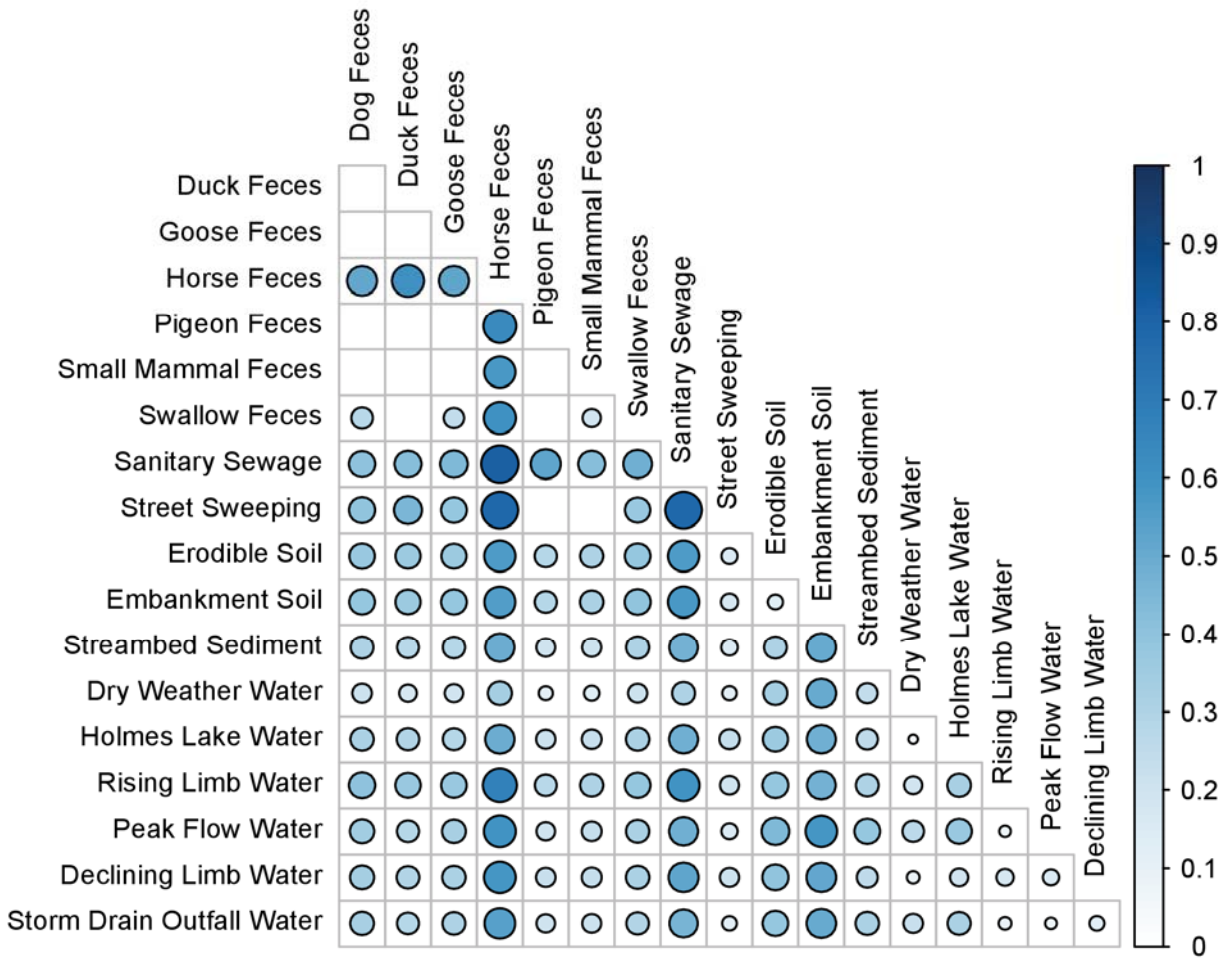

56

57 Figure S7: Results of PERMANOVA based on weighted UniFrac distance showing the  
 58 comparison of microbial composition between different sample types. Size and color of the  
 59 circles both represent  $R^2$  value. Circles are shown only for significant  $R^2$  (Benjamini &  
 60 Hochberg adjusted  $p < 0.05$ ).

## Embankment Soil

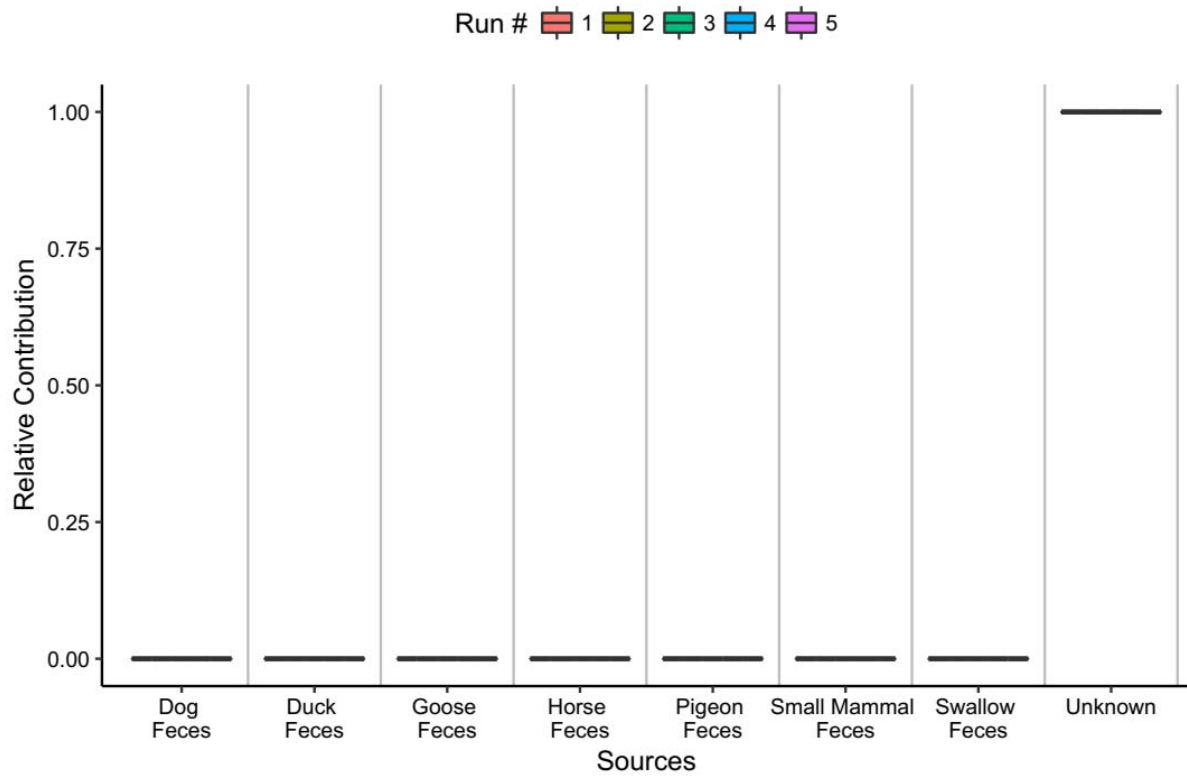

61

62 Figure S8: Five runs of SourceTracker analysis showing the relative contributions of potential  
63 fecal sources to the overall microbial community in embankment soil.

## Erodible Soil

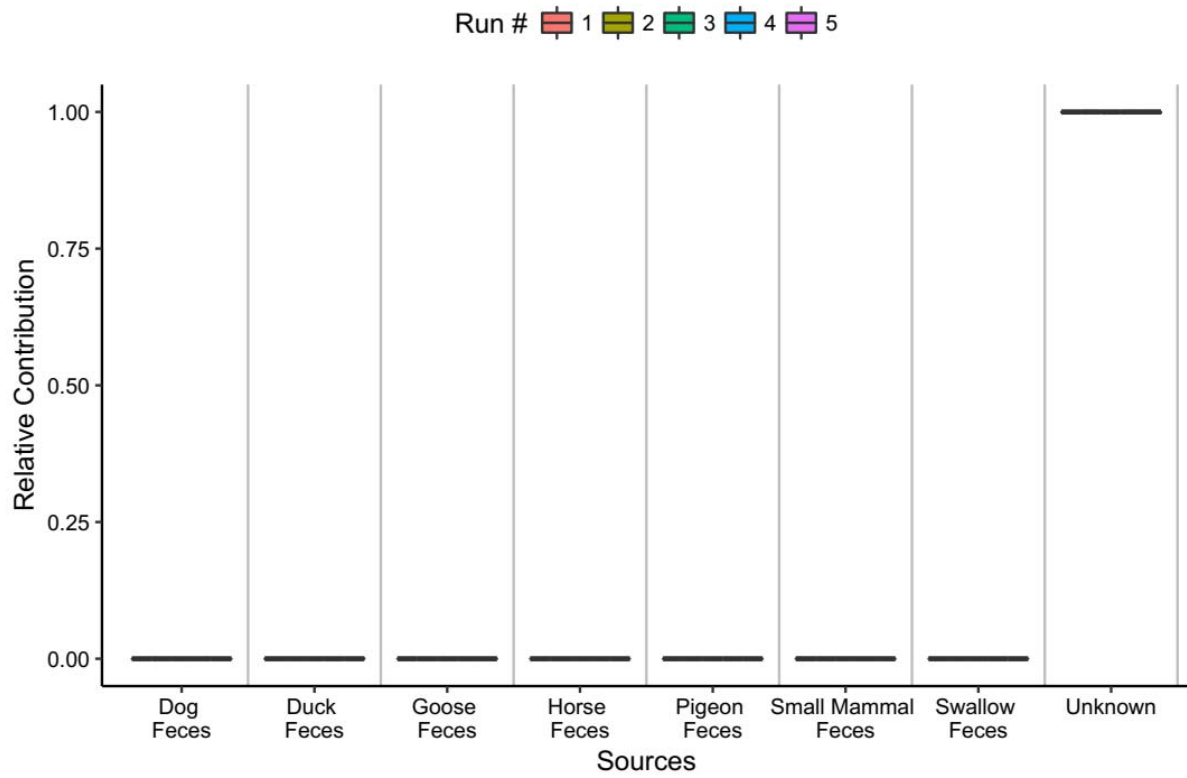

64

65 Figure S9: Five runs of SourceTracker analysis showing the relative contributions of potential

66 fecal sources to the overall microbial community in erodible soil.

# Holmes Lake

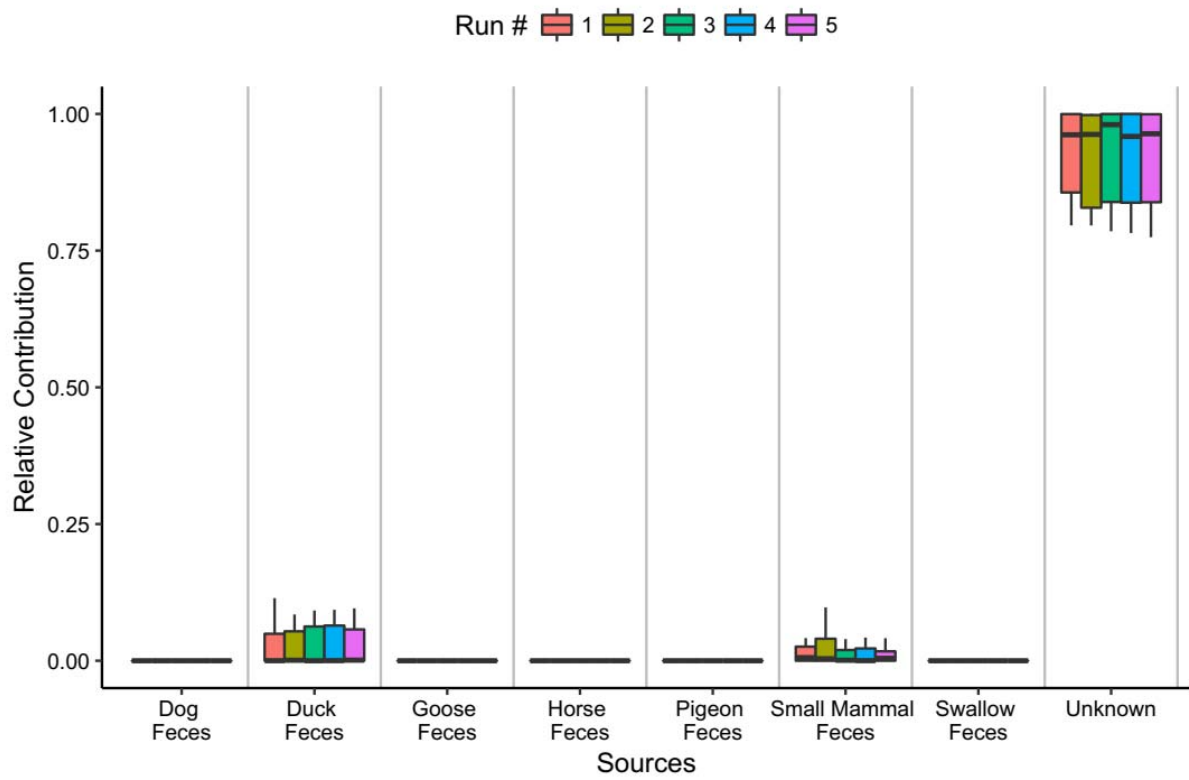

67

68 Figure S10: Five runs of SourceTracker analysis showing the relative contributions of potential

69 fecal sources to the overall microbial community in Holmes Lake.

## Streambed Sediment

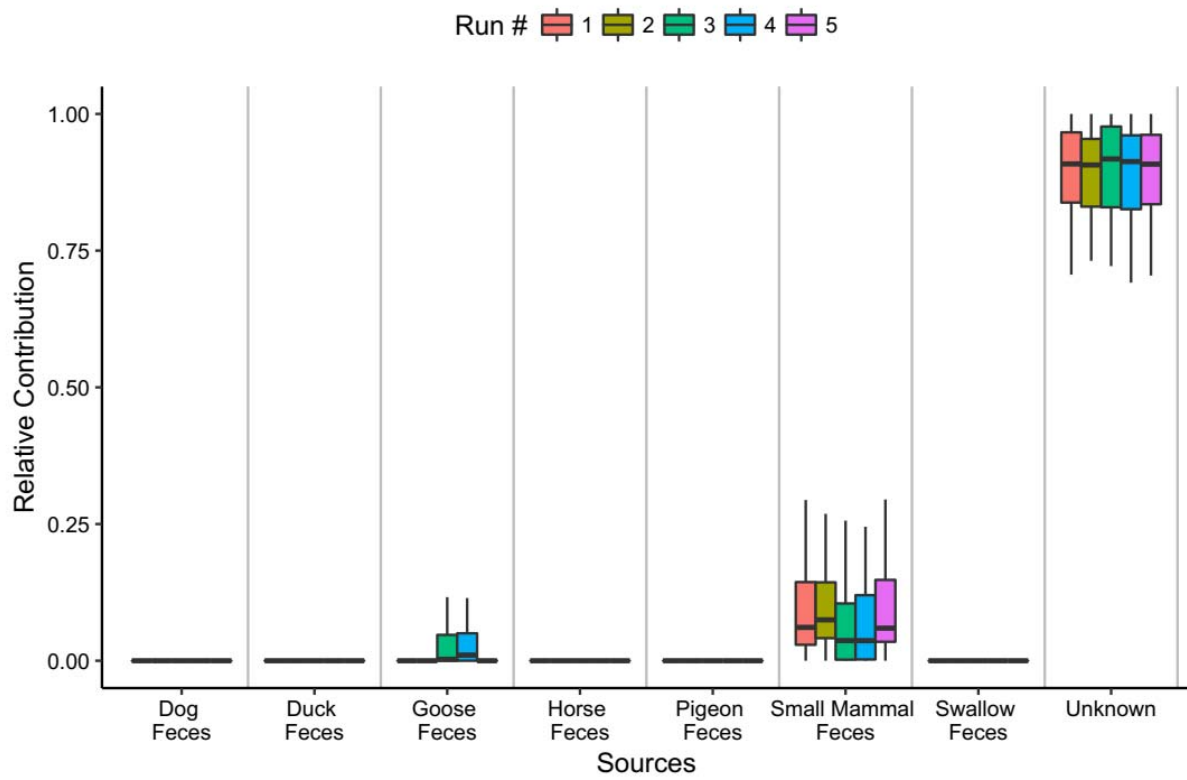

70

71 Figure S11: Five runs of SourceTracker analysis showing the relative contributions of potential  
72 fecal sources to the overall microbial community in streambed sediment.

## Street Sweepings

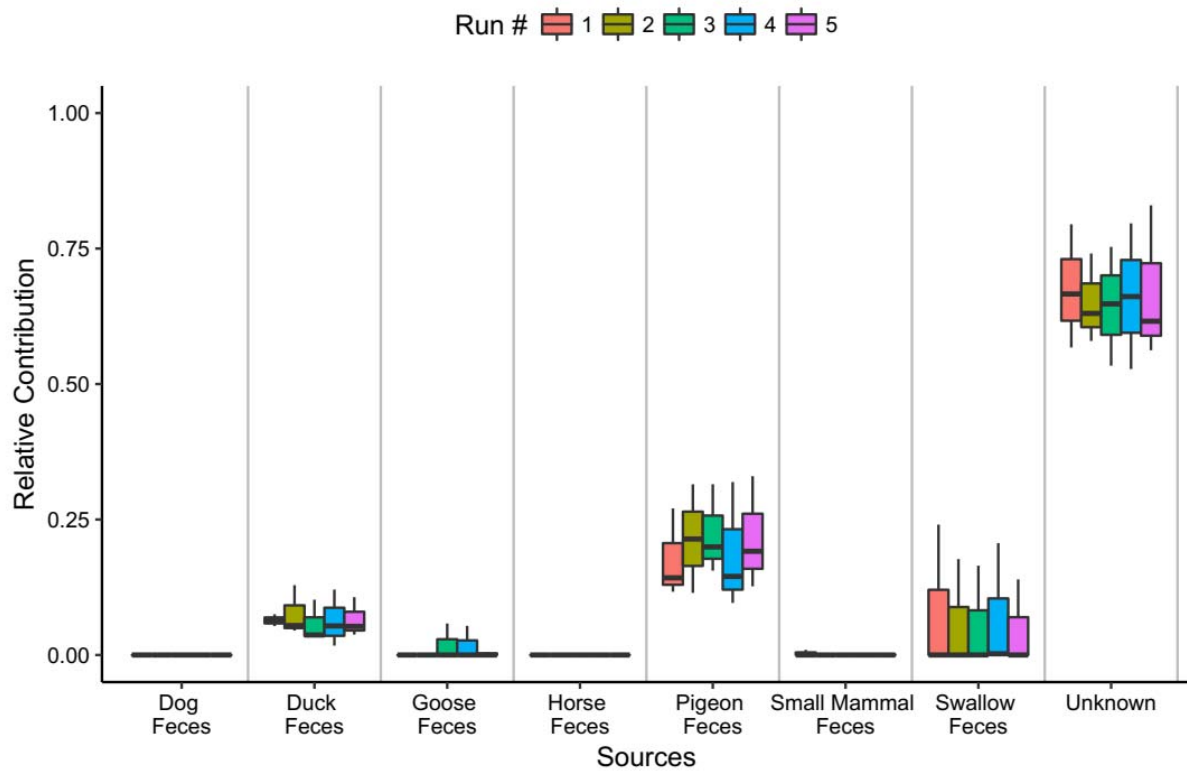

73

74 Figure S12: Five runs of SourceTracker analysis showing the relative contributions of potential

75 fecal sources to the overall microbial community in street sweeping.

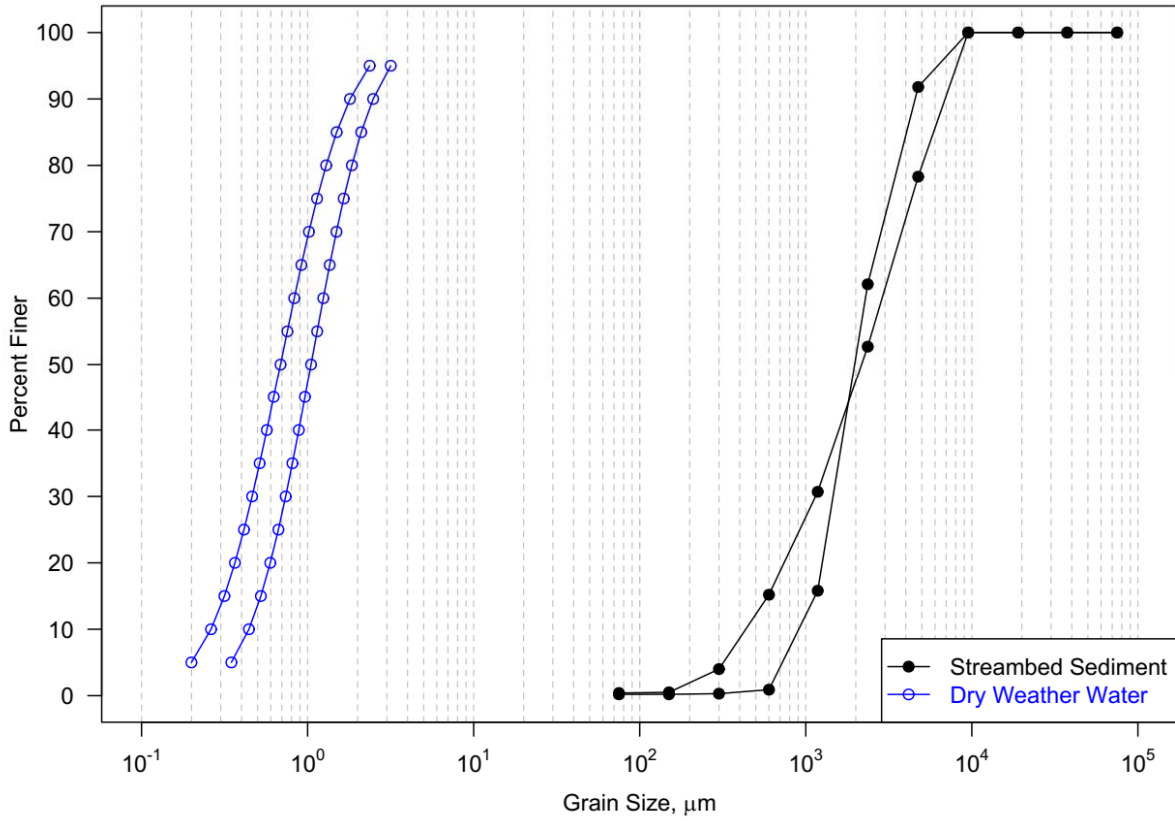

76

77 Figure S13: Particle size analysis for typical dry weather water and streambed sediment samples

78 from Antelope Creek.

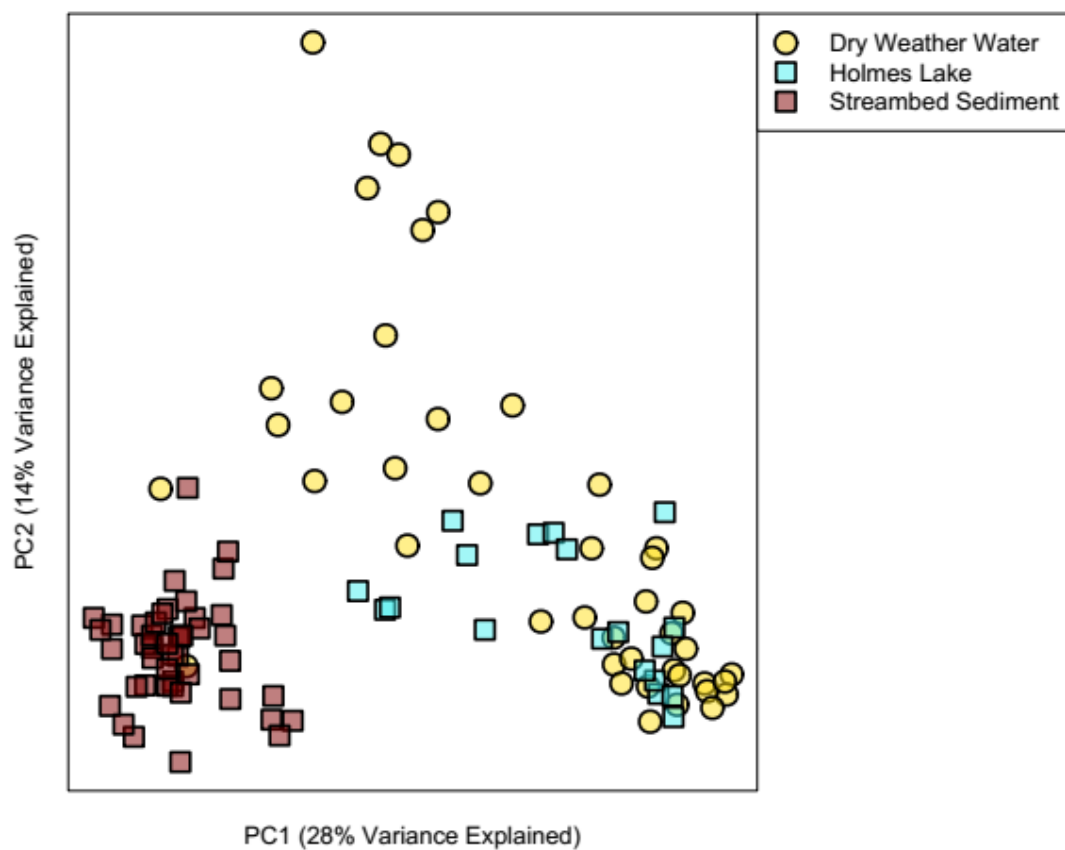

79

80 Figure S14: Principal coordinate analysis plot based on weighted UniFrac distance showing the  
 81 relationship among the microbial communities in one sink environment (dry weather water) and  
 82 two source environments (upstream reservoir Holmes Lake and streambed sediment).
